# Supplementary material for: Critical roles of long noncoding RNAs in Drosophila spermatogenesis
Source: PubMed Central journal article supplement — Genome Res. 2016 Sep;26(9):1233–44. doi: 10.1101/gr.199547.115 (PMC5052038; doi:10.1101/gr.199547.115), 2016-09
Supplement: supp_gr.199547.115_Supplemental_Table_S1.pdf [file supp_gr.199547.115_Supplemental_Table_S1.pdf]

**Supplemental Table S1. Name, location, homologous recombination efficiency, and phenotype classification of the 105 targeted lncRNAs.**

|                                                            | lncRNA name     | Chromosomal location       | Target length (bp) | HR efficiency (100%) | Knockout phenotype                   |
|------------------------------------------------------------|-----------------|----------------------------|--------------------|----------------------|--------------------------------------|
| Class 1<br>novel lncRNAs predicted<br>using bioinformatics | lncRNA:TS1      | 2L:20,551,151..20,551,400  | 250                | 5.56%                | male fertility decreased by 60%-100% |
|                                                            | lncRNA:TS2      | 2L:3,586,751..3,588,150    | 1400               | 3.70%                | male fertility decreased by 30%-60%  |
|                                                            | lncRNA:TS3      | 3L:20,557,301..20,557,600  | 300                | 16.67%               | male fertility decreased by 30%-60%  |
|                                                            | lncRNA:TS4      | 2L:2,639,301..2,639,600    | 350                | 8.33%                | no/minor phenotype                   |
|                                                            | lncRNA:TS5      | 3R:6,106,079..6,106,378    | 300                | 6.06%                | no/minor phenotype                   |
|                                                            | lncRNA:TS6      | 2L:4,655,551..4,656,200    | 650                | 47.06%               | no/minor phenotype                   |
|                                                            | lncRNA:TS7      | 3L:3,619,701..3,620,150    | 450                | 14.55%               | no/minor phenotype                   |
|                                                            | lncRNA:TS8      | 2L:11,403,551..11,403,950  | 400                | 10.00%               | no/minor phenotype                   |
|                                                            | lncRNA:TS9      | 2L:12,774,451..12,774,900  | 450                | 5.41%                | no/minor phenotype                   |
|                                                            | lncRNA:TS10     | 2L:13,126,751..13,127,050  | 300                | 3.70%                | no/minor phenotype                   |
|                                                            | lncRNA:TS11     | 2L:2,625,501..2,625,700    | 200                | 14.29%               | no/minor phenotype                   |
|                                                            | lncRNA:TS12     | 3R:23,672,529..23,672,878  | 200                | 20.00%               | no/minor phenotype                   |
|                                                            | lncRNA:TS13     | 2L:2,632,551..2,632,850    | 300                | 9.52%                | no/minor phenotype                   |
|                                                            | lncRNA:TS14     | 3R:7,326,879..7,327,078    | 300                | 18.00%               | no/minor phenotype                   |
|                                                            | lncRNA:TS15     | 2L:3,397,551..3,397,900    | 650                | 6.25%                | male fertility decreased by 30%-60%  |
|                                                            | lncRNA:TS16     | 3R:16,801,429..16,801,828  | 650                | 16.67%               | no/minor phenotype                   |
|                                                            | lncRNA:TS17     | 2R: 15,048,746..15,049,145 | 400                | 16.13%               | male fertility decreased by 30%-60%  |
|                                                            | lncRNA:TS18     | 2R:8,310,859..8,311,295    | 437                | 8.00%                | male fertility decreased by 0%-30%   |
|                                                            | lncRNA:TS19     | 2L:2,625,701..2,629,900    | 400                | 7.84%                | no/minor phenotype                   |
|                                                            | lncRNA:TS20     | 3R:5,970,879..5,971,212    | 334                | 15.79%               | no/minor phenotype                   |
|                                                            | lncRNA:TS21     | 2L:2,626,701..2,626,900    | 350                | 11.76%               | no/minor phenotype                   |
|                                                            | lncRNA:TS22     | 3R:26,770,429..26,770,878  | 450                | 3.23%                | no/minor phenotype                   |
|                                                            | lncRNA:TS23     | 3R:30,865,779..30,866,028  | 250                | 18.52%               | male fertility decreased by 30%-60%  |
|                                                            | lncRNA:TS24     | 3R:10,944,579..10,945,028  | 450                | 6.25%                | no/minor phenotype                   |
|                                                            | lncRNA:TS25     | 3R:11,307,629..11,307,928  | 300                | 3.13%                | no/minor phenotype                   |
|                                                            | lncRNA:TS26     | 3R: 13,541,779..13,542,328 | 550                | 14.29%               | male fertility decreased by 0%-30%   |
|                                                            | lncRNA:TS27     | 3R:28,000,279..28,000,628  | 200                | 9.38%                | male fertility decreased by 30%-60%  |
|                                                            | CR45302         | 2L:14,885,105..14,885,411  | 307                | 8.57%                | no/minor phenotype                   |
|                                                            | CR45727         | 2L:14,876,832..14,877,136  | 305                | 5.45%                | male fertility decreased by 0%-30%   |
|                                                            | CR44949         | 3R:25,823,706..25,825,211  | 1506               | 30.67%               | no/minor phenotype                   |
|                                                            | CR44776         | 2L:6,551,854..6,552,436    | 583                | 7.69%                | no/minor phenotype                   |
|                                                            | CR44967         | 3R:13,085,478..13,085,976  | 499                | 40.00%               | no/minor phenotype                   |
|                                                            | CR45557         | 3R:32,015,941..32,026,928  | 10988              | 2.78%                | no/minor phenotype                   |
|                                                            | CR45242         | 3L:10,269,482..10,270,353  | 871                | 6.45%                | no/minor phenotype                   |
|                                                            | CR44874         | 2L:10,051,362..10,052,289  | 927                | 1.89%                | no/minor phenotype                   |
|                                                            | CR45418         | 3L:6,608,770..6,609,238    | 469                | 12.50%               | no/minor phenotype                   |
|                                                            | CR44278         | 2R:8,768,296..8,768,795    | 500                | 15.63%               | no/minor phenotype                   |
|                                                            | CR45670         | 3L:4,107,143..4,107,470    | 328                | 17.86%               | male fertility decreased by 0%-30%   |
|                                                            | CR45054         | 3R:10,083,381..10,090,525  | 7145               | 1.41%                | no/minor phenotype                   |
|                                                            | CR44455/CR44456 | 2R:23,127,604..23,128,477  | 874                | 10.75%               | male infertility                     |
|                                                            | CR44943         | 3R:14,375,399..14,377,344  | 1946               | 5.33%                | no/minor phenotype                   |
|                                                            | CR44401         | 3R:20,485,778..20,486,679  | 902                | 36.36%               | no/minor phenotype                   |
|                                                            | CR45283         | 2L:12,316,272..12,317,313  | 1042               | 6.38%                | no/minor phenotype                   |
|                                                            | CR43356         | 2L:12,174,090..12,174,638  | 549                | 2.86%                | male fertility decreased by 0%-30%   |
|                                                            | CR44805         | 2R:23,840,577..23,840,777  | 201                | 19.05%               | no/minor phenotype                   |
|                                                            | CR45630         | 3R:16,406,641..16,407,107  | 467                | 4.17%                | no/minor phenotype                   |
|                                                            | CR43764         | 2L:15,295,636..15,297,699  | 2064               | 7.55%                | no/minor phenotype                   |
|                                                            | CR43701         | 3L:1,488,739..1,488,831    | 93                 | 12.00%               | no/minor phenotype                   |
|                                                            | CR44371         | 2R:15,330,395..15,331,195  | 801                | 7.14%                | male fertility decreased by 60%-100% |
|                                                            | CR42657         | X:9,688,189..9,689,295     | 1107               | 22.41%               | no/minor phenotype                   |
|                                                            | CR45187         | 3R:4,402,429..4,402,928    | 500                | 1.75%                | no/minor phenotype                   |
|                                                            | CR43859         | 2L:11,205,528..11,206,092  | 565                | 2.38%                | no/minor phenotype                   |
|                                                            | CR43492         | X:18,586,223..18,587,219   | 997                | 6.94%                | no/minor phenotype                   |

|                                                                                                    |                                         |                           |      |        |                                      |
|----------------------------------------------------------------------------------------------------|-----------------------------------------|---------------------------|------|--------|--------------------------------------|
| Class 2<br>annotated lncRNAs highly<br>and/or specifically<br>expressed in fly testis<br>(Flybase) | CR45722/CR45723/CR43839                 | 2L:19,469,126..19,471,627 | 2502 | 2.17%  | male fertility decreased by 30%-60%  |
|                                                                                                    | CR45608                                 | X:18,310,502..18,311,349  | 848  | 1.25%  | no/minor phenotype                   |
|                                                                                                    | CR45174                                 | 3L:23,690,626..23,691,668 | 1043 | 10.34% | no/minor phenotype                   |
|                                                                                                    | CR44585                                 | 2L:11,338,551..11,339,200 | 650  | 15.91% | male fertility decreased by 60%-100% |
|                                                                                                    | CR45542                                 | X:9,589,818..9,590,767    | 950  | 2.50%  | male fertility decreased by 30%-60%  |
|                                                                                                    | CR17567                                 | 2L:19,183,092..19,183,613 | 522  | 6.25%  | no/minor phenotype                   |
|                                                                                                    | CR32661                                 | X:11,917,806..11,918,678  | 872  | 9.86%  | no/minor phenotype                   |
|                                                                                                    | CR9284                                  | 2R:21,803,402..21,804,338 | 937  | 7.35%  | no/minor phenotype                   |
|                                                                                                    | CR42858                                 | 3R:9,824,085..9,824,864   | 780  | 15.07% | male fertility decreased by 30%-60%  |
|                                                                                                    | CR43823                                 | 2L:3,588,485..3,590,301   | 1817 | 7.14%  | no/minor phenotype                   |
|                                                                                                    | CR43484                                 | 3L:3,688,786..3,689,409   | 624  | 9.38%  | male fertility decreased by 0%-30%   |
|                                                                                                    | CR43862                                 | X:20,686,819..20,687,653  | 835  | 8.00%  | male fertility decreased by 0%-30%   |
|                                                                                                    | CR43608                                 | 2L:20,607,043..20,607,847 | 805  | 14.29% | no/minor phenotype                   |
|                                                                                                    | CR43852                                 | 2L:2,646,030..2,646,281   | 252  | 11.54% | male fertility decreased by 0%-30%   |
|                                                                                                    | CR43718                                 | 2L:396,120..396,571       | 452  | 3.57%  | no/minor phenotype                   |
|                                                                                                    | CR43282                                 | 3R:19,920,597..19,921,310 | 714  | 6.52%  | male fertility decreased by 60%-100% |
|                                                                                                    | CR42859                                 | 2L:2,245,230..2,247,383   | 2154 | 7.84%  | male fertility decreased by 30%-60%  |
|                                                                                                    | CR43416                                 | 2R:16,357,737..16,358,481 | 745  | 4.84%  | male fertility decreased by 60%-100% |
|                                                                                                    | CR43631/CR43632/CR43633/CR43634/CR43847 | 3R:25,791,642..25,797,778 | 6137 | 9.09%  | male fertility decreased by 30%-60%  |
|                                                                                                    | CR42645                                 | 2R:24,498,083..24,498,669 | 587  | 11.54% | no/minor phenotype                   |
|                                                                                                    | CR43705/CR43706                         | 3L:20,795,019..20,796,502 | 1484 | 5.71%  | no/minor phenotype                   |
|                                                                                                    | CR43848                                 | 3R:13,574,825..13,575,479 | 655  | 10.14% | male fertility decreased by 0%-30%   |
|                                                                                                    | CR43835                                 | X:7,500,443..7,501,383    | 941  | 10.71% | no/minor phenotype                   |
|                                                                                                    | CR43304                                 | 2L:17,541,854..17,542,383 | 530  | 5.80%  | no/minor phenotype                   |
|                                                                                                    | CR43802                                 | 2L:17,042,481..17,043,165 | 685  | 2.56%  | male fertility decreased by 0%-30%   |
|                                                                                                    | CR43414                                 | 2L:20,296,643..20,297,299 | 657  | 2.94%  | male fertility decreased by 0%-30%   |
|                                                                                                    | CR43306                                 | 3L:18,294,604..18,295,800 | 1197 | 18.99% | male fertility decreased by 0%-30%   |
|                                                                                                    | CR43807                                 | 2L:10,862,194..10,864,697 | 2504 | 16.13% | no/minor phenotype                   |
|                                                                                                    | CR43655                                 | 3R:22,964,038..22,964,630 | 593  | 5.71%  | no/minor phenotype                   |
|                                                                                                    | CR43753                                 | 2L:2,271,319..2,279,714   | 8396 | 6.74%  | male fertility decreased by 60%-100% |
|                                                                                                    | CR43434                                 | 3R:26,428,590..26,429,173 | 584  | 12.90% | no/minor phenotype                   |
|                                                                                                    | CR43486/CR43487                         | 3R:6,126,476..6,127,955   | 1480 | 25.29% | no/minor phenotype                   |
|                                                                                                    | CR43622                                 | 2R:15,049,775..15,050,355 | 581  | 41.67% | no/minor phenotype                   |
|                                                                                                    | CR43625                                 | 3L:15,437,201..15,437,713 | 513  | 1.56%  | no/minor phenotype                   |
|                                                                                                    | CR43627                                 | 3L:4,929,295..4,931,138   | 1844 | 10.00% | no/minor phenotype                   |
|                                                                                                    | CR43682                                 | 2L:15,277,797..15,279,497 | 1701 | 3.70%  | no/minor phenotype                   |
|                                                                                                    | CR45006                                 | 2L:1,345,965..1,346,331   | 367  | 7.27%  | no/minor phenotype                   |
|                                                                                                    | CR44852                                 | 2L:14,532,484..14,533,471 | 988  | 20.59% | no/minor phenotype                   |
|                                                                                                    | CR44670/CR44671                         | 3L:18,456,399..18,457,550 | 1152 | 1.75%  | no/minor phenotype                   |
|                                                                                                    | CR44420                                 | 2R:18,246,127..18,246,763 | 637  | 19.75% | male fertility decreased by 60%-100% |
|                                                                                                    | CR44413                                 | 2L:17,625,098..17,625,690 | 593  | 20.83% | no/minor phenotype                   |
|                                                                                                    | CR44412                                 | 2L:17,606,465..17,607,260 | 796  | 11.70% | male fertility decreased by 60%-100% |
|                                                                                                    | CR44344                                 | 2R:17,386,841..17,389,081 | 2240 | 3.28%  | male fertility decreased by 30%-60%  |
|                                                                                                    | CR44337                                 | 3R:7,331,500..7,332,002   | 503  | 1.98%  | no/minor phenotype                   |
|                                                                                                    | CR44324                                 | 3R:23,485,481..23,486,085 | 605  | 11.43% | no/minor phenotype                   |
|                                                                                                    | CR44279                                 | 2R:8,542,796..8,543,542   | 747  | 12.20% | no/minor phenotype                   |
|                                                                                                    | CR44256                                 | 3R:17,371,271..17,371,757 | 487  | 18.75% | no/minor phenotype                   |
|                                                                                                    | CR44131                                 | 2R:6,068,795..6,069,795   | 1001 | 3.61%  | no/minor phenotype                   |
|                                                                                                    | CR44081                                 | 2L:6,812,640..6,813,110   | 470  | 24.56% | no/minor phenotype                   |
|                                                                                                    | CR43939                                 | 3L:21,576,033..21,577,219 | 1187 | 9.28%  | no/minor phenotype                   |
|                                                                                                    | CR43819                                 | 2L:17,085,650..17,086,419 | 770  | 4.55%  | no/minor phenotype                   |
|                                                                                                    | CR43721                                 | 2L:11,307,753..11,308,038 | 286  | 24.24% | no/minor phenotype                   |
