# Supplementary material for: Critical roles of long noncoding RNAs in Drosophila spermatogenesis
Source: PubMed Central journal article supplement — Genome Res. 2016 Sep;26(9):1233–44. doi: 10.1101/gr.199547.115 (PMC5052038; doi:10.1101/gr.199547.115), 2016-09
Supplement: supp_gr.199547.115_Supplemental_Table_S2.pdf [file supp_gr.199547.115_Supplemental_Table_S2.pdf]

**Supplemental Table S2. Statistics of lncRNAs of different evolutionary ages, with or without phenotypic effects.**

| Age (MY)             | With defective knockout phenotype | Without defective knockout phenotype | Subtotal | Proportion with knockout phenotype | <i>P</i> * |
|----------------------|-----------------------------------|--------------------------------------|----------|------------------------------------|------------|
| <b>Young lncRNAs</b> |                                   |                                      |          |                                    |            |
| 0 - 20               | 12                                | 24                                   | 36       | 33.3%                              | 1.00       |
| 20 - 40              | 12                                | 20                                   | 32       | 37.5%                              | 1.00       |
| Total                | 24                                | 44                                   | 68       | 35.3%                              | 1.00       |
| <b>Old lncRNAs</b>   |                                   |                                      |          |                                    |            |
| >40                  | 17                                | 31                                   | 48       | 35.4%                              | –          |

\*Two-tailed Fisher's exact test *P* for lncRNAs with/without phenotype in each age group compared with old lncRNA genes (>40 Mya).
