# Supplementary material for: Critical roles of long noncoding RNAs in Drosophila spermatogenesis
Source: PubMed Central journal article supplement — Genome Res. 2016 Sep;26(9):1233–44. doi: 10.1101/gr.199547.115 (PMC5052038; doi:10.1101/gr.199547.115), 2016-09
Supplement: supp_gr.199547.115_Supplemental_Table_S3.pdf [file supp_gr.199547.115_Supplemental_Table_S3.pdf]

**Supplemental Table S3. Primer sequences for gRNA synthesis and homologous recombination arm construction of the 105 targeted lncRNAs.**

| lncRNA name  | Primer name        | Primer sequence (5' -3' )                                   |
|--------------|--------------------|-------------------------------------------------------------|
| lncRNA: TS1  | lncRNA: TS1-gRNA1  | TAATACGACTCACTATAGGGTGGTGTGGTTGGTTGTTGTTTTAGAGCTAGAAATAGC   |
|              | lncRNA: TS1-gRNA2  | TAATACGACTCACTATAGGGTACAAGCACTGTTTACAGTTTTAGAGCTAGAAATAGC   |
| lncRNA: TS2  | lncRNA: TS2-gRNA1  | TAATACGACTCACTATAGGAGGAGGAAAAGGGTTCGGTTTTAGAGCTAGAAATAGC    |
|              | lncRNA: TS2-gRNA2  | TAATACGACTCACTATAGGAACCAGTGGATATGGTTGTTTTAGAGCTAGAAATAGC    |
| lncRNA: TS3  | lncRNA: TS3-gRNA1  | TAATACGACTCACTATAGGAGAACTGGAGTAGTTGGTTTTAGAGCTAGAAATAGC     |
|              | lncRNA: TS3-gRNA2  | TAATACGACTCACTATAGGACGCTACAGTAGTGCAGCGTTTTAGAGCTAGAAATAGC   |
| lncRNA: TS4  | lncRNA: TS4-gRNA1  | TAATACGACTCACTATAGGAGAATAAACTTTCCAGCGTTTTAGAGCTAGAAATAGC    |
|              | lncRNA: TS4-gRNA2  | TAATACGACTCACTATAGGACGACGACGATGGAGTCGTTTTAGAGCTAGAAATAGC    |
| lncRNA: TS5  | lncRNA: TS5-gRNA1  | TAATACGACTCACTATAGGGTTATAACCTTGAAAAGTGTGTTTTAGAGCTAGAAATAGC |
|              | lncRNA: TS5-gRNA2  | TAATACGACTCACTATAGGACAGTCCAGTTTTCTGCGTTTTAGAGCTAGAAATAGC    |
| lncRNA: TS6  | lncRNA: TS6-gRNA1  | TAATACGACTCACTATAGGAACGAAAACGAAAAGTAAGGGTTTTAGAGCTAGAAATAGC |
|              | lncRNA: TS6-gRNA2  | TAATACGACTCACTATAGGAGCCCAGCGGCTCCAAGTGTGTTTTAGAGCTAGAAATAGC |
| lncRNA: TS7  | lncRNA: TS7-gRNA1  | TAATACGACTCACTATAGGAATACCTTATGACGCTGAGTTTTAGAGCTAGAAATAGC   |
|              | lncRNA: TS7-gRNA2  | TAATACGACTCACTATAGGGAGAAATGGAGAAGTGTGTTTTAGAGCTAGAAATAGC    |
| lncRNA: TS8  | lncRNA: TS8-gRNA1  | TAATACGACTCACTATAGGGACTCCGGATCTCGGGCGTTTTAGAGCTAGAAATAGC    |
|              | lncRNA: TS8-gRNA2  | TAATACGACTCACTATAGGATAGATGTTGTATCTATGTTTTAGAGCTAGAAATAGC    |
| lncRNA: TS9  | lncRNA: TS9-gRNA1  | TAATACGACTCACTATAGGAGGGTGTGGCAAAGTGAGTTTTAGAGCTAGAAATAGC    |
|              | lncRNA: TS9-gRNA2  | TAATACGACTCACTATAGGGTTCAGGTGCAACGAGGGTTTTAGAGCTAGAAATAGC    |
| lncRNA: TS10 | lncRNA: TS10-gRNA1 | TAATACGACTCACTATAGGAAGGAAAATCTAGCCAGCGTTTTAGAGCTAGAAATAGC   |
|              | lncRNA: TS10-gRNA2 | TAATACGACTCACTATAGGATGAAAGCGGTCGCCAGCGTTTTAGAGCTAGAAATAGC   |
| lncRNA: TS11 | lncRNA: TS11-gRNA1 | TAATACGACTCACTATAGGGTGAATCCCTGGCCATAGTTTTAGAGCTAGAAATAGC    |
|              | lncRNA: TS11-gRNA2 | TAATACGACTCACTATAGGATGTGGCATTCCGGGCGGTTTTAGAGCTAGAAATAGC    |
| lncRNA: TS12 | lncRNA: TS12-gRNA1 | TAATACGACTCACTATAAGGTGTCGTGATGCCGCTAGGTTTTAGAGCTAGAAATAGC   |
|              | lncRNA: TS12-gRNA2 | TAATACGACTCACTATAGGGCTAGCTGGGAGGTAAGTTTTAGAGCTAGAAATAGC     |
| lncRNA: TS13 | lncRNA: TS13-gRNA1 | TAATACGACTCACTATAGGAGGAGCAGCTGTGGATGGGTTTTAGAGCTAGAAATAGC   |
|              | lncRNA: TS13-gRNA2 | TAATACGACTCACTATAGGAGAAAAATGCCACGAAAAGTTTTAGAGCTAGAAATAGC   |
| lncRNA: TS14 | lncRNA: TS14-gRNA1 | TAATACGACTCACTATAGGAAGCGATGGAAGGGTACTGTTTTAGAGCTAGAAATAGC   |
|              | lncRNA: TS14-gRNA2 | TAATACGACTCACTATAGGAGGAGCGGATGACCATTGAGTTTTAGAGCTAGAAATAGC  |
| lncRNA: TS15 | lncRNA: TS15-gRNA1 | TAATACGACTCACTATAGGATGCGAAACGCGGGCCGTTTTAGAGCTAGAAATAGC     |
|              | lncRNA: TS15-gRNA2 | TAATACGACTCACTATAGGAGTTGGTCCAATGTAAAAGTTTTAGAGCTAGAAATAGC   |
| lncRNA: TS16 | lncRNA: TS16-gRNA1 | TAATACGACTCACTATAGGGGACCGGACTCGGGAATGTTTTAGAGCTAGAAATAGC    |
|              | lncRNA: TS16-gRNA2 | TAATACGACTCACTATAGGATTACTGGCTCTCTCATGTTTTAGAGCTAGAAATAGC    |
| lncRNA: TS17 | lncRNA: TS17-gRNA1 | TAATACGACTCACTATAGGAAAGCCTTAACCATCGCAGTTTTAGAGCTAGAAATAGC   |
|              | lncRNA: TS17-gRNA2 | TAATACGACTCACTATAGGATAACTCTCGAGTGAAACGTTTTAGAGCTAGAAATAGC   |
| lncRNA: TS18 | lncRNA: TS18-gRNA1 | TAATACGACTCACTATAGGGAAAATGGTCTTAGCCATTGTTTTAGAGCTAGAAATAGC  |
|              | lncRNA: TS18-gRNA2 | TAATACGACTCACTATAGGACACCTGGCCTGGGGCATGTTTTAGAGCTAGAAATAGC   |
| lncRNA: TS19 | lncRNA: TS19-gRNA1 | TAATACGACTCACTATAGGACGAAGCCCATGAGGATGTTTTAGAGCTAGAAATAGC    |
|              | lncRNA: TS19-gRNA2 | TAATACGACTCACTATAGGAAAAGCAAGCCACAAGTTTTAGAGCTAGAAATAGC      |
| lncRNA: TS20 | lncRNA: TS20-gRNA1 | TAATACGACTCACTATAGGAAAGCGGTATCTTTGTGCGTTTTAGAGCTAGAAATAGC   |
|              | lncRNA: TS20-gRNA2 | TAATACGACTCACTATAGGGATTCCGCGCTGGATTAGTTTTAGAGCTAGAAATAGC    |
| lncRNA: TS21 | lncRNA: TS21-gRNA1 | TAATACGACTCACTATAGGATTTGAAAACGAGAAGCAGTTTTAGAGCTAGAAATAGC   |
|              | lncRNA: TS21-gRNA2 | TAATACGACTCACTATAGGGCTTAAGGTGAACTGACAGTTTTAGAGCTAGAAATAGC   |
| lncRNA: TS22 | lncRNA: TS22-gRNA1 | TAATACGACTCACTATAGGGCAGCAGTAAGTGTATAAGTTTTAGAGCTAGAAATAGC   |
|              | lncRNA: TS22-gRNA2 | TAATACGACTCACTATAGGAACATGGACGATTTGAAAAGTTTTAGAGCTAGAAATAGC  |
| lncRNA: TS23 | lncRNA: TS23-gRNA1 | TAATACGACTCACTATAGGACGCTTCGGGAGTACAGGTTTTAGAGCTAGAAATAGC    |
|              | lncRNA: TS23-gRNA2 | TAATACGACTCACTATAGGAGAACGCCCTCTCGCAGCGTTTTAGAGCTAGAAATAGC   |
| lncRNA: TS24 | lncRNA: TS24-gRNA1 | TAATACGACTCACTATAGGAAGAGGTGGGCGGGATGTGTTTTAGAGCTAGAAATAGC   |
|              | lncRNA: TS24-gRNA2 | TAATACGACTCACTATAGGGAAGGTGTGCTCCTTTGGTTTTAGAGCTAGAAATAGC    |
| lncRNA: TS25 | lncRNA: TS25-gRNA1 | TAATACGACTCACTATAGGGATTGCTGTTGCGGGTGCCTTTTTAGAGCTAGAAATAGC  |
|              | lncRNA: TS25-gRNA2 | TAATACGACTCACTATAGGAGCAATCTCCATAAATCTGTTTTAGAGCTAGAAATAGC   |
| lncRNA: TS26 | lncRNA: TS26-gRNA1 | TAATACGACTCACTATAGGAAAATGGAATGGCACACGTTTTAGAGCTAGAAATAGC    |
|              | lncRNA: TS26-gRNA2 | TAATACGACTCACTATAGGAGCGAGAGGAAAAGGAAAGTTTTAGAGCTAGAAATAGC   |
| lncRNA: TS27 | lncRNA: TS27-gRNA1 | TAATACGACTCACTATAGGGCATCCGGGTGTAACGTTTTAGAGCTAGAAATAGC      |
|              | lncRNA: TS27-gRNA2 | TAATACGACTCACTATAGGGCCTTGATGATGACAACAGTTTTAGAGCTAGAAATAGC   |

|                 |                 |                                                             |
|-----------------|-----------------|-------------------------------------------------------------|
| CR45302         | CR45302-gRNA1   | TAATACGACTCACTATAGGATCAACTGCCGATTCTGAACGTTTTAGAGCTAGAAATAGC |
|                 | CR45302-gRNA2   | TAATACGACTCACTATAGGGATTTTAAAGTTATTACACGTTTTAGAGCTAGAAATAGC  |
| CR45727         | CR45727-gRNA1   | TAATACGACTCACTATAGGACACTCATCGGAGCTCTCAGTTTTAGAGCTAGAAATAGC  |
|                 | CR45727-gRNA2   | TAATACGACTCACTATAGGGACACTGGTACACGTGGAGTTTTAGAGCTAGAAATAGC   |
| CR44949         | CR44949-gRNA1   | TAATACGACTCACTATAGGGCGAGCACACAAGGCCAAAGTTTTAGAGCTAGAAATAGC  |
|                 | CR44949-gRNA2   | TAATACGACTCACTATAGGAAAGGCAACTGGTCAAGAGGTTTTAGAGCTAGAAATAGC  |
| CR44776         | CR44776-gRNA1   | TAATACGACTCACTATAGGGCAGGAGTCCCTATCCTCGTTTTAGAGCTAGAAATAGC   |
|                 | CR44776-gRNA2   | TAATACGACTCACTATAGGGCATTGGCTGCCGGGTGTTTTAGAGCTAGAAATAGC     |
| CR44967         | CR44967-gRNA1   | TAATACGACTCACTATAGGGCGGCACTGGGCCATCTGTTTTAGAGCTAGAAATAGC    |
|                 | CR44967-gRNA2   | TAATACGACTCACTATAGGTGCACCCGAGCCAAATGTTTTAGAGCTAGAAATAGC     |
| CR45557         | CR45557-gRNA1   | TAATACGACTCACTATAGGGAAGCAGATGTTGACAAGTTTTAGAGCTAGAAATAGC    |
|                 | CR45557-gRNA2   | TAATACGACTCACTATAGGGAAGGAAGTAGGGGCAGTTTTAGAGCTAGAAATAGC     |
| CR45242         | CR45242-gRNA1   | TAATACGACTCACTATAGGTCGCGTAAAGTCTCCAGTTTTAGAGCTAGAAATAGC     |
|                 | CR45242-gRNA2   | TAATACGACTCACTATAGGCATCCGAGTTGGGCGGTGTTTTAGAGCTAGAAATAGC    |
|                 | CR44874-gRNA1   | TAATACGACTCACTATAGGTGGACAACGTTTGCACCGTTTTAGAGCTAGAAATAGC    |
| CR44874         | CR44874-gRNA2   | TAATACGACTCACTATAGGAAATGATGTGATGCTCTGTTTTAGAGCTAGAAATAGC    |
|                 | CR44874-gRNA3   | TAATACGACTCACTATAGGATAGCAGTATCGAAACCGTTTTAGAGCTAGAAATAGC    |
| CR45418         | CR45418-gRNA1   | TAATACGACTCACTATAGGAAAGGAAAGTCCCCGAGTTTTAGAGCTAGAAATAGC     |
|                 | CR45418-gRNA2   | TAATACGACTCACTATAGGAGGCCAGTTCGGGCTTGTGTTTTAGAGCTAGAAATAGC   |
| CR44278         | CR44278-gRNA1   | TAATACGACTCACTATAGGTGGTATGGTATCCAGCTGTTTTAGAGCTAGAAATAGC    |
|                 | CR44278-gRNA2   | TAATACGACTCACTATAGGACGAGCGAGTGGTGTGGTAGTTTTAGAGCTAGAAATAGC  |
| CR45670         | CR45670-gRNA1   | TAATACGACTCACTATAGGGGCAACTCTCACGCAAGTTTTAGAGCTAGAAATAGC     |
|                 | CR45670-gRNA2   | TAATACGACTCACTATAGGTCGCGCCATCAATCAAGTTTTAGAGCTAGAAATAGC     |
|                 | CR45054-gRNA1   | TAATACGACTCACTATAGGTGGAGAGTGGAGCAAGAGCGTTTTAGAGCTAGAAATAGC  |
| CR45054         | CR45054-gRNA2   | TAATACGACTCACTATAGGGGCAGTGTGGGCGAGTTTTAGAGCTAGAAATAGC       |
|                 | CR45054-gRNA3   | TAATACGACTCACTATAGGTGGGGCGTGGCAAGAGTTTTAGAGCTAGAAATAGC      |
|                 | CR45054-gRNA4   | TAATACGACTCACTATAGGTGAAGCTAAAGCGAATTGTTTTAGAGCTAGAAATAGC    |
| CR44455/CR44456 | CR44455/6-gRNA1 | TAATACGACTCACTATAGGTTTCTTTAGTAGTATCCAGTTTTAGAGCTAGAAATAGC   |
|                 | CR44455/6-gRNA2 | TAATACGACTCACTATAGGAGTGCCTCTCCTCGCAAGTTTTAGAGCTAGAAATAGC    |
|                 | CR44943-gRNA1   | TAATACGACTCACTATAGGATGCAATACCTACTTATTGGTTTTAGAGCTAGAAATAGC  |
| CR44943         | CR44943-gRNA2   | TAATACGACTCACTATAGGAAGGGGACACGAAGTCCGAGTTTTAGAGCTAGAAATAGC  |
|                 | CR44943-gRNA3   | TAATACGACTCACTATAGGACGAAGTTTGGCCGACTAAGTTTTAGAGCTAGAAATAGC  |
|                 | CR44401-gRNA1   | TAATACGACTCACTATAGGAGAACTACATTCCGATCGTTTTAGAGCTAGAAATAGC    |
| CR44401         | CR44401-gRNA2   | TAATACGACTCACTATAGGACTGCTCCGTACTACGCGTTTTAGAGCTAGAAATAGC    |
|                 | CR44401-gRNA3   | TAATACGACTCACTATAGGAAGGAAAGGGTCGACCAGTTTTAGAGCTAGAAATAGC    |
|                 | CR45283-gRNA1   | TAATACGACTCACTATAGGACGCTACCACAACCGATGTTTTAGAGCTAGAAATAGC    |
| CR45283         | CR45283-gRNA2   | TAATACGACTCACTATAGGTAGATCCGTGCTATTTTGTGTTTTAGAGCTAGAAATAGC  |
|                 | CR45283-gRNA3   | TAATACGACTCACTATAGGATGGCTTTGGGACGGCAGGTTTTAGAGCTAGAAATAGC   |
| CR43356         | CR43356-gRNA1   | TAATACGACTCACTATAGGACCAGCCGACTCCTCCAAGTTTTAGAGCTAGAAATAGC   |
|                 | CR43356-gRNA2   | TAATACGACTCACTATAGGATTAGAATGCAGCTTATTTAGTTTTAGAGCTAGAAATAGC |
| CR44805         | CR44805-gRNA1   | TAATACGACTCACTATAGGTGCACGGTGGTCAAAAAGTTTTAGAGCTAGAAATAGC    |
|                 | CR44805-gRNA2   | TAATACGACTCACTATAGGTTTGAGGGACTCAACACAGTTTTAGAGCTAGAAATAGC   |
| CR45630         | CR45630-gRNA1   | TAATACGACTCACTATAGGTGCTGCTGGTGGTGGGTTTTAGAGCTAGAAATAGC      |
|                 | CR45630-gRNA2   | TAATACGACTCACTATAGGAATGCATCCTATATGCAGTTTTAGAGCTAGAAATAGC    |
|                 | CR43764-gRNA1   | TAATACGACTCACTATAGGAAGCAATCGTCCCACAGCCGTTTTAGAGCTAGAAATAGC  |
| CR43764         | CR43764-gRNA2   | TAATACGACTCACTATAGGAACGAGATTTATGTTAGTAGTTTTAGAGCTAGAAATAGC  |
|                 | CR43764-gRNA3   | TAATACGACTCACTATAGGAATGGTCACGTGATACGTCGTTTTAGAGCTAGAAATAGC  |
| CR43701         | CR43701-gRNA1   | TAATACGACTCACTATAGGAAGTATCTCTCTGGGCCCGTTTTAGAGCTAGAAATAGC   |
|                 | CR43701-gRNA2   | TAATACGACTCACTATAGGCGGTTCCAGTGCCCGCGTTTTAGAGCTAGAAATAGC     |

|                         |                       |                                                              |
|-------------------------|-----------------------|--------------------------------------------------------------|
| CR44371                 | CR44371-gRNA1         | TAATACGACTCACTATAGGAAGTGGAGCAGAGCAATGGGTTTTAGAGCTAGAAATAGC   |
|                         | CR44371-gRNA2         | TAATACGACTCACTATAGGAGACTTTTAGTGGCAACTC GTTTTAGAGCTAGAAATAGC  |
| CR42657                 | CR42657-gRNA1         | TAATACGACTCACTATAGGGAGTCAAAGTAGAAATGAGTTTTAGAGCTAGAAATAGC    |
|                         | CR42657-gRNA2         | TAATACGACTCACTATAGGAGCAGCGCAGGATCTAAGTTTTAGAGCTAGAAATAGC     |
|                         | CR42657-gRNA3         | TAATACGACTCACTATAGGAGTAGAGGATCCTTTTCGTGTTTTAGAGCTAGAAATAGC   |
| CR45187                 | CR45187-gRNA1         | TAATACGACTCACTATAGGGTGTGGTAAAAAGTTTCTGTTTTAGAGCTAGAAATAGC    |
|                         | CR45187-gRNA2         | TAATACGACTCACTATAGGATAAACTATAATTAACACGTTTTAGAGCTAGAAATAGC    |
| CR43859                 | CR43859-gRNA1         | TAATACGACTCACTATAGGTAAGTGCAGCGTCAGCAAGTTTTAGAGCTAGAAATAGC    |
|                         | CR43859-gRNA2         | TAATACGACTCACTATAGGTCCTAATTGAAGCGAGGGTTTTAGAGCTAGAAATAGC     |
|                         | CR43492-gRNA1         | TAATACGACTCACTATAGGATGATGGCTGCACCCGGTGTGTTTTAGAGCTAGAAATAGC  |
| CR43492                 | CR43492-gRNA2         | TAATACGACTCACTATAGGATGTGCTTATGATGTGCTGTTTTAGAGCTAGAAATAGC    |
|                         | CR43492-gRNA3         | TAATACGACTCACTATAGGAGTGGAGTGGAGTGGTGTGTTTTAGAGCTAGAAATAGC    |
|                         | CR45722/3/43839-gRNA1 | TAATACGACTCACTATAGGGCAGACACGAGCAAAGTCCGTTTTAGAGCTAGAAATAGC   |
| CR45722/CR45723/CR43839 | CR45722/3/43839-gRNA2 | TAATACGACTCACTATAGGATTGGGATTGCGGCAGTTTTAGAGCTAGAAATAGC       |
|                         | CR45722/3/43839-gRNA3 | TAATACGACTCACTATAGGAGTCGGACTCGGAATCCTTGTGTTTTAGAGCTAGAAATAGC |
|                         | CR45722/3/43839-gRNA4 | TAATACGACTCACTATAGGAAACTTGGAGCATTGGAGTTTTAGAGCTAGAAATAGC     |
| CR45608                 | CR45608-gRNA1         | TAATACGACTCACTATAGGGCCGAAACGGACAGCGGAGTTTTAGAGCTAGAAATAGC    |
|                         | CR45608-gRNA2         | TAATACGACTCACTATAGGACCCACAACCCACAGAGAGTTTTAGAGCTAGAAATAGC    |
|                         | CR45608-gRNA3         | TAATACGACTCACTATAGGATTTCTATCTGGTACCTTTGTTTTAGAGCTAGAAATAGC   |
| CR45174                 | CR45174-gRNA1         | TAATACGACTCACTATAGGAGGAGTCAGCCGTTTGGTGTGTTTTAGAGCTAGAAATAGC  |
|                         | CR45174-gRNA2         | TAATACGACTCACTATAGGATCGAGCCGTGCGCAAAAGTTTTAGAGCTAGAAATAGC    |
| CR44585                 | CR44585-gRNA1         | TAATACGACTCACTATAGGGTGAATTGTTGCTCGTCGTTTTAGAGCTAGAAATAGC     |
|                         | CR44585-gRNA2         | TAATACGACTCACTATAGGGTGAATTGTTGCTCGTCGTTTTAGAGCTAGAAATAGC     |
| CR45542                 | CR45542-gRNA1         | TAATACGACTCACTATAGAAGTGCCCGCCTTTTGTGTGTTTTAGAGCTAGAAATAGC    |
|                         | CR45542-gRNA2         | TAATACGACTCACTATAGGGCAGCGATTGGTGGCGTTTTAGAGCTAGAAATAGC       |
| CR17567                 | CR17567-gRNA1         | TAATACGACTCACTATAGGGTATCTACGAGTGTTCGTTTTAGAGCTAGAAATAGC      |
|                         | CR17567-gRNA2         | TAATACGACTCACTATAGGATGTACAACTGCTGCGTTTTAGAGCTAGAAATAGC       |
| CR32661                 | CR32661-gRNA1         | TAATACGACTCACTATAGGGTGAAGTTGAAAGTTTCGGCGTTTTAGAGCTAGAAATAGC  |
|                         | CR32661-gRNA2         | TAATACGACTCACTATAGGAGCTAGCACCTGTATCACGTTTTAGAGCTAGAAATAGC    |
| CR9284                  | CR9284-gRNA1          | TAATACGACTCACTATAGGGTAGGGTATCCAAGGTAGTTTTAGAGCTAGAAATAGC     |
|                         | CR9284-gRNA2          | TAATACGACTCACTATAGGGTAGGGTATCCAAGGTAGTTTTAGAGCTAGAAATAGC     |
| CR42858                 | CR42858-gRNA1         | TAATACGACTCACTATAGGAACCAATGACGAGAGGCCGTTTTAGAGCTAGAAATAGC    |
|                         | CR42858-gRNA2         | TAATACGACTCACTATAGGGTACGCGTTTGTCTCAACGTTTTAGAGCTAGAAATAGC    |
| CR43823                 | CR43823-gRNA1         | TAATACGACTCACTATAGGATAGCGAGGGAGCCGCGTTTTAGAGCTAGAAATAGC      |
|                         | CR43823-gRNA2         | TAATACGACTCACTATAGGAACTTGGCAGCTGCTCCTGTTTTAGAGCTAGAAATAGC    |
| CR43484                 | CR43484-gRNA1         | TAATACGACTCACTATAGGGCAGAACTTTGGGTGAGTTTTAGAGCTAGAAATAGC      |
|                         | CR43484-gRNA2         | TAATACGACTCACTATAGGATCTTGCATCTTGGATCGTTTTAGAGCTAGAAATAGC     |
| CR43862                 | CR43862-gRNA1         | TAATACGACTCACTATAGGGCCGCAAGTGTGATATGGTTTTAGAGCTAGAAATAGC     |
|                         | CR43862-gRNA2         | TAATACGACTCACTATAGGGTGGTCTTCCGTCGGCACGTTTTAGAGCTAGAAATAGC    |
| CR43608                 | CR43608-gRNA1         | TAATACGACTCACTATAGGAACAGAGTGCCAGAGTGAGTTTTAGAGCTAGAAATAGC    |
|                         | CR43608-gRNA2         | TAATACGACTCACTATAGGGAAAGCCGGGAAATGCGGTTTTAGAGCTAGAAATAGC     |
| CR43852                 | CR43852-gRNA1         | TAATACGACTCACTATAGGGCTGTTTCAGGTGCCACAGTTTTAGAGCTAGAAATAGC    |
|                         | CR43852-gRNA2         | TAATACGACTCACTATAGGGTGCAGTGCACCTCCTGTTTTAGAGCTAGAAATAGC      |
| CR43718                 | CR43718-gRNA1         | TAATACGACTCACTATAGGATATGGAGGAGTCCCCGGTTTTAGAGCTAGAAATAGC     |
|                         | CR43718-gRNA2         | TAATACGACTCACTATAGGATAGCACGGACGTGGCCATGTTTTAGAGCTAGAAATAGC   |
| CR43282                 | CR43282-gRNA1         | TAATACGACTCACTATAGGAACGATTTATACAATGAGAGTTTTAGAGCTAGAAATAGC   |
|                         | CR43282-gRNA2         | TAATACGACTCACTATAGGAGGGATACAATGAGTCAGAGTTTTAGAGCTAGAAATAGC   |
| CR42859                 | CR42859-gRNA1         | TAATACGACTCACTATAGGAATACAATCTTTTTGAAGTTTTAGAGCTAGAAATAGC     |
|                         | CR42859-gRNA2         | TAATACGACTCACTATAGGGTGGAGTGGTTGGGAAATCGTTTTAGAGCTAGAAATAGC   |
| CR43416                 | CR43416-gRNA1         | TAATACGACTCACTATAGGAAGCGAAGCAGGAGACAGCGTTTTAGAGCTAGAAATAGC   |
|                         | CR43416-gRNA2         | TAATACGACTCACTATAGGAAAATTCGCAAGAGCAGTGTGTTTTAGAGCTAGAAATAGC  |

|                                         |                                                            |                                                                                                                                                                                    |
|-----------------------------------------|------------------------------------------------------------|------------------------------------------------------------------------------------------------------------------------------------------------------------------------------------|
| CR43631/CR43632/CR43633/CR43634/CR43847 | CR43631/2/3/4/CR43847-gRNA1<br>CR43631/2/3/4/CR43847-gRNA2 | TAATACGACTCACTATAGGGGAAAAGAAATGAGGAAGTTTTAGAGCTAGAAATAGC<br>TAATACGACTCACTATAGGGGTGTTTTGTGAAAACCTCTGTTTTAGAGCTAGAAATAGC                                                            |
| CR42645                                 | CR42645-gRNA1<br>CR42645-gRNA2                             | TAATACGACTCACTATAGGAAAACATCTTTCTGAAAGGTTTTAGAGCTAGAAATAGC<br>TAATACGACTCACTATAGGACTCGGATTCCTTTTCTCGTTTTAGAGCTAGAAATAGC                                                             |
| CR43705/CR43706                         | CR43705/6-gRNA1<br>CR43705/6-gRNA2                         | TAATACGACTCACTATAGGAGAATGAAAAACTGCCGTTTTAGAGCTAGAAATAGC<br>TAATACGACTCACTATAGGTGTAAGACGATCCTTAGTGTTTTAGAGCTAGAAATAGC                                                               |
| CR43848                                 | CR43848-gRNA1<br>CR43848-gRNA2                             | TAATACGACTCACTATAGGAACGGACATAGGAACGGATGTTTTAGAGCTAGAAATAGC<br>TAATACGACTCACTATAGGGAGGTAGGTAGGTAGAGGCGTTTTAGAGCTAGAAATAGC                                                           |
| CR43835                                 | CR43835-gRNA1<br>CR43835-gRNA2                             | TAATACGACTCACTATAGGGGGCCACATCAAAATTCAGTTTTAGAGCTAGAAATAGC<br>TAATACGACTCACTATAGGAAGGCGCAAATTGCCCTGTTTTAGAGCTAGAAATAGC                                                              |
| CR43304                                 | CR43304-gRNA1<br>CR43304-gRNA2                             | TAATACGACTCACTATAGGTGAGGAAAAGCTAAGAAAAGTTTTAGAGCTAGAAATAGC<br>TAATACGACTCACTATAGGGGACACCACGCGGAACACAGTTTTAGAGCTAGAAATAGC                                                           |
| CR43802                                 | CR43802-gRNA1<br>CR43802-gRNA2                             | TAATACGACTCACTATAGGTGTTGTTGAATTTCCGATGTTTTAGAGCTAGAAATAGC<br>TAATACGACTCACTATAGGACAACGGGCAGGACACCGAGTTTTAGAGCTAGAAATAGC                                                            |
| CR43414                                 | CR43414-gRNA1<br>CR43414-gRNA2                             | TAATACGACTCACTATAGGGAAATCGTCATGTGCCCGTTTTAGAGCTAGAAATAGC<br>TAATACGACTCACTATAGGAATGGGGATCGGGATCAGTTTTAGAGCTAGAAATAGC                                                               |
| CR43306                                 | CR43306-gRNA1<br>CR43306-gRNA2<br>CR43306-gRNA3            | TAATACGACTCACTATAGGTGCGAATCGGAATTCACGTTTTAGAGCTAGAAATAGC<br>TAATACGACTCACTATAGGAAAGGGTGTGGTGTGGAGTTTTAGAGCTAGAAATAGC<br>TAATACGACTCACTATAGGACTGCGAACCCCTCCTCGTTTTAGAGCTAGAAATAGC   |
| CR43807                                 | CR43807-gRNA1<br>CR43807-gRNA2                             | TAATACGACTCACTATAGGCTGCGAAGTGGGTGGTGGTTTTAGAGCTAGAAATAGC<br>TAATACGACTCACTATAGGGAAGCACGAGAGGCGGTGTTTTAGAGCTAGAAATAGC                                                               |
| CR43655                                 | CR43655-gRNA1<br>CR43655-gRNA2<br>CR43753-gRNA1            | TAATACGACTCACTATAGGCTGGTGAGGATTCGGTAGTTTTAGAGCTAGAAATAGC<br>TAATACGACTCACTATAGGATGCGGTGACTTCTGTGGAGTTTTAGAGCTAGAAATAGC<br>TAATACGACTCACTATAGGAAAATATGAGCCGAGAGTTTTAGAGCTAGAAATAGC  |
| CR43753                                 | CR43753-gRNA2<br>CR43753-gRNA3<br>CR43753-gRNA4            | TAATACGACTCACTATAGGGGAAAATAGTGAAAAGCGTTTTAGAGCTAGAAATAGC<br>TAATACGACTCACTATAGGAAAGTGCACCTTTTGTGGTTTTAGAGCTAGAAATAGC<br>TAATACGACTCACTATAGGATGAGTTATGATCCGAAGTTTTAGAGCTAGAAATAGC   |
| CR43434                                 | CR43434-gRNA1<br>CR43434-gRNA2                             | TAATACGACTCACTATAGGGCAACAAGGCAACTAGGGTTTTAGAGCTAGAAATAGC<br>TAATACGACTCACTATAGGAATAAAGGCACGAAAAGTTTTAGAGCTAGAAATAGC                                                                |
| CR43486/CR43487                         | CR43486/7-gRNA1<br>CR43486/7-gRNA2                         | TAATACGACTCACTATAGGAGATGAGCTGCAGGGAATGTTTTAGAGCTAGAAATAGC<br>TAATACGACTCACTATAGGTCTAATTGGAAGTGACAAAAGTTTTAGAGCTAGAAATAGC                                                           |
| CR43622                                 | CR43622-gRNA1<br>CR43622-gRNA2                             | TAATACGACTCACTATAGGAGTTACTGGAGACCCAGCGTTTTAGAGCTAGAAATAGC<br>TAATACGACTCACTATAGGAGGGCCACATTCATTTGCAGTTTTAGAGCTAGAAATAGC                                                            |
| CR43625                                 | CR43625-gRNA1<br>CR43625-gRNA2<br>CR43627-gRNA1            | TAATACGACTCACTATAGGAGCGCATGGGCCACTACGTTTTAGAGCTAGAAATAGC<br>TAATACGACTCACTATAGGGATTTGGCATGCGGAGTGGTTTTAGAGCTAGAAATAGC<br>TAATACGACTCACTATAGGATAACGAGTGCACAGTGGTTTTAGAGCTAGAAATAGC  |
| CR43627                                 | CR43627-gRNA2<br>CR43627-gRNA3<br>CR43627-gRNA4            | TAATACGACTCACTATAGGAGATTTCGATGGGTGGCGTTTTAGAGCTAGAAATAGC<br>TAATACGACTCACTATAGGATAGGATGTGCATTATGCGTTTTAGAGCTAGAAATAGC<br>TAATACGACTCACTATAGGTGCGTTCTGCATTTGGCGTTTTAGAGCTAGAAATAGC  |
| CR43682                                 | CR43682-gRNA1<br>CR43682-gRNA2                             | TAATACGACTCACTATAGGTGGACCGAATCGAAAACCTAGTTTTAGAGCTAGAAATAGC<br>TAATACGACTCACTATAGGGAGGAAGGCGGTGCTGGGTTTTAGAGCTAGAAATAGC                                                            |
| CR45006                                 | CR45006-gRNA1<br>CR45006-gRNA2<br>CR44852-gRNA1            | TAATACGACTCACTATAGGTTTCGGAACCCGAGAACACGTTTTAGAGCTAGAAATAGC<br>TAATACGACTCACTATAAGGATGTAGGAGCCCAAAGGTTTTAGAGCTAGAAATAGC<br>TAATACGACTCACTATAGGAGCCTTATCCGATTTCTGTTTTAGAGCTAGAAATAGC |
| CR44852                                 | CR44852-gRNA2<br>CR44852-gRNA3                             | TAATACGACTCACTATAGGATTTGAAAATGATTAGTCGTTTTAGAGCTAGAAATAGC<br>TAATACGACTCACTATAGGAGTGTGCGACGCCTTTGAGTTTTAGAGCTAGAAATAGC                                                             |
| CR44670/CR44671                         | CR44670/1-gRNA1<br>CR44670/1-gRNA2<br>CR44670/1-gRNA3      | TAATACGACTCACTATAGGGCAAATGAATTCAGCTTGTTTTTAGAGCTAGAAATAGC<br>TAATACGACTCACTATAGGAAATGTGGTAAGTGTGTGTTTTAGAGCTAGAAATAGC<br>TAATACGACTCACTATAGGGTTGCCGGAATGGGAAGTTTTAGAGCTAGAAATAGC   |
| CR44420                                 | CR44420-gRNA1<br>CR44420-gRNA2                             | TAATACGACTCACTATAGGGAGACAAGCGGAGAACCCTTTTTAGAGCTAGAAATAGC<br>TAATACGACTCACTATAGGATGTGGATTTGGACTGTGCCGTTTTAGAGCTAGAAATAGC                                                           |
| CR44413                                 | CR44413-gRNA1<br>CR44413-gRNA2                             | TAATACGACTCACTATAGGAAATGTGCAAAGGGGTGTTTTAGAGCTAGAAATAGC<br>TAATACGACTCACTATAGGATAATGAAGCCTGACCTTTGTTTTAGAGCTAGAAATAGC                                                              |

|         |               |                                                            |
|---------|---------------|------------------------------------------------------------|
|         | CR44412-gRNA1 | TAATACGACTCACTATAGGAATTCCTTTTTGTTTTCGTTTTAGAGCTAGAAATAGC   |
| CR44412 | CR44412-gRNA2 | TAATACGACTCACTATAGGGTGGGCATTGGGTGGCTGTTTTAGAGCTAGAAATAGC   |
|         | CR44412-gRNA3 | TAATACGACTCACTATAGGAAATCTGCCAGGGGGCGGTTTTAGAGCTAGAAATAGC   |
|         | CR44344-gRNA1 | TAATACGACTCACTATAGGTTTCTTAGAGTACCTTTGTTTTAGAGCTAGAAATAGC   |
| CR44344 | CR44344-gRNA2 | TAATACGACTCACTATAGGTAACAAAAAGTCGGACTGTTTTAGAGCTAGAAATAGC   |
|         | CR44344-gRNA3 | TAATACGACTCACTATAGAACCCGGATGAGCGGACGGTTTTAGAGCTAGAAATAGC   |
|         | CR44344-gRNA4 | TAATACGACTCACTATAGGATGGTGTTCATATGCCATGTTTTAGAGCTAGAAATAGC  |
| CR44337 | CR44337-gRNA1 | TAATACGACTCACTATAGGTCCAATTAGGGCCAAATAGTTTTAGAGCTAGAAATAGC  |
|         | CR44337-gRNA2 | TAATACGACTCACTATAGGTCGTGTTGATGTTTTATGTTTTAGAGCTAGAAATAGC   |
|         | CR44324-gRNA1 | TAATACGACTCACTATAGGTCCTGGAGTGCCGATTGTTTTAGAGCTAGAAATAGC    |
| CR44324 | CR44324-gRNA2 | TAATACGACTCACTATAGGATCTGCTGCGGTTGTCTGAGTTTTAGAGCTAGAAATAGC |
|         | CR44279-gRNA1 | TAATACGACTCACTATAGGGAAGGAGCGGAAAAAATGTTTTAGAGCTAGAAATAGC   |
| CR44279 | CR44279-gRNA2 | TAATACGACTCACTATAGGGGCATACTCGCCTGGATAGTTTTAGAGCTAGAAATAGC  |
|         | CR44256-gRNA1 | TAATACGACTCACTATAGGGTTGGTGGGCCTTTTGCGTTTTAGAGCTAGAAATAGC   |
| CR44256 | CR44256-gRNA2 | TAATACGACTCACTATAGGTTGTTTGCCGCGAAATGTTTTAGAGCTAGAAATAGC    |
|         | CR44131-gRNA1 | TAATACGACTCACTATAGGTCACAGGCCACAGCCGCGTTTTAGAGCTAGAAATAGC   |
| CR44131 | CR44131-gRNA2 | TAATACGACTCACTATAGGGTTGATCAGGATGCCAAGTTTTAGAGCTAGAAATAGC   |
|         | CR44081-gRNA1 | TAATACGACTCACTATAGGACAGCAGAGTGAAGAGTGTTTTTAGAGCTAGAAATAGC  |
| CR44081 | CR44081-gRNA2 | TAATACGACTCACTATAGTGGTGTCTGCCCATCTGCGTTTTAGAGCTAGAAATAGC   |
|         | CR43939-gRNA1 | TAATACGACTCACTATAAGGATTGACCTGATTTTGTGTTTTAGAGCTAGAAATAGC   |
| CR43939 | CR43939-gRNA2 | TAATACGACTCACTATAGGGATCCTGGTCCAGATTAGTTTTAGAGCTAGAAATAGC   |
|         | CR43819-gRNA1 | TAATACGACTCACTATAGGATCCTGGAAGCCTTGTAACGTTTTAGAGCTAGAAATAGC |
| CR43819 | CR43819-gRNA2 | TAATACGACTCACTATAGGGATTTGTAAATGCGGAAAGTTTTAGAGCTAGAAATAGC  |
|         | CR43721-gRNA1 | TAATACGACTCACTATAGGAGATTGGGATGGAGACGGTTTTAGAGCTAGAAATAGC   |
| CR43721 | CR43721-gRNA2 | TAATACGACTCACTATAGGGAGACTTATGCCCTTTTAGTTTTAGAGCTAGAAATAGC  |

---

**Supplemental Table S3. Primer sequences for gRNA synthesis and homologous recombination arm construction of the 105 targeted lncRNAs.**

| lncRNA name | Primer name                | Primer sequence (5' -3' )                    |
|-------------|----------------------------|----------------------------------------------|
| lncRNA:TS1  | lncRNA:TS1-left HR arm-F   | CTACAAGGTACCTTTCCCCATCATACACATCCAG           |
|             | lncRNA:TS1-left HR arm-R   | ATGAAGGCGGCCGCTGAGCTCTGAGCCGCAACG            |
|             | lncRNA:TS1-right HR arm-F  | CACATGGCGCGCCAAACAGTGCTTGTACCCTCATCAC        |
|             | lncRNA:TS1-right HR arm-R  | AAGATGCTCGAGGGTGCCTCATTCCGACGATT             |
| lncRNA:TS2  | lncRNA:TS2-left HR arm-F   | CATCTTGGTACCGAACATATGAGTGACTGAATGAATGGCTTGA  |
|             | lncRNA:TS2-left HR arm-R   | ATGATGACCGGTATGGCGGCCGAACCCCTTTCTCCTCCAGCTA  |
|             | lncRNA:TS2-right HR arm-F  | CACATGGCGCGCCCTTTGTTCGCTGCTCTATAAAT          |
|             | lncRNA:TS2-right HR arm-R  | ATGATGACTAGTGAAGAACCAGAACTGAGCTGAAC          |
| lncRNA:TS3  | lncRNA:TS3-left HR arm-F   | CATCATGGTACCTTCCACTTTGTCTGGGCGTCTC           |
|             | lncRNA:TS3-left HR arm-R   | ATGATGACCGGTTTGTGGGGCCAGCTGTGCGTGG           |
|             | lncRNA:TS3-right HR arm-F  | ATCTAGGCGCGCCCACTACTGTAGCGTCCATGTGG          |
|             | lncRNA:TS3-right HR arm-R  | ATGATGCTCGAGATGACTAGTTAACATAGGTTGACCCCTTTCC  |
| lncRNA:TS4  | lncRNA:TS4-left HR arm-F   | CATCATGGTACCTACTCGACTGTCTGTCTCGTC            |
|             | lncRNA:TS4-left HR arm-R   | ATTAGGCGGCCGAGCAGGTGAGTGGCTTGTGTG            |
|             | lncRNA:TS4-right HR arm-F  | CTCATAGGCGCGCCAGCTCCTGTTTCTGTCTCGTTC         |
|             | lncRNA:TS4-right HR arm-R  | ATGATGACTAGTAGCCCTTGAATCTCCTTCTAATAA         |
| lncRNA:TS5  | lncRNA:TS5-left HR arm-F   | CATCATCATATGTAAGGTAGGTCGCCGAGTCAT            |
|             | lncRNA:TS5-left HR arm-R   | CTTCTGGTGGCGCCGAGATGATTGGGGGATAACA           |
|             | lncRNA:TS5-right HR arm-F  | CATCTAGGCGCGCCATCGTTGTCATCAGGTTGC            |
|             | lncRNA:TS5-right HR arm-R  | ATGATGCTCGAGATTGTTTGGGATAAGGGTT              |
| lncRNA:TS6  | lncRNA:TS6-left HR arm-F   | CATCATGGTACCCTACATATGTCGCTTAAATGGTACATGGTGC  |
|             | lncRNA:TS6-left HR arm-R   | ATGATGACCGGTCATTTTATATATCCACAACCTTTT         |
|             | lncRNA:TS6-right HR arm-F  | CACATGGCGCGCCCTAGTCGACTGGAGCCGCTGGGCTCCGGTTT |
|             | lncRNA:TS6-right HR arm-R  | ATGATGCTCGAGATGACTAGTAGCTGAGTAAAGCGGCACAAAT  |
| lncRNA:TS7  | lncRNA:TS7-left HR arm-F   | CATCTAGGTACCTCCCATTTCCTCGGCAGTC              |
|             | lncRNA:TS7-left HR arm-R   | ATTCCGATGCGCCGCCATAAAAGCAAATGCGTAAA          |
|             | lncRNA:TS7-right HR arm-F  | CTACTAGGCGCGCCCGAACGATTGGAGATGACT            |
|             | lncRNA:TS7-right HR arm-R  | ATGAGTCTCGAGCCCAGAAACCCAGCAGACA              |
| lncRNA:TS8  | lncRNA:TS8-left HR arm-F   | CATCTAGGTACCGTACATATGACTGGCGTGGGATTATGTTGGA  |
|             | lncRNA:TS8-left HR arm-R   | ATGATGGCGCGCCCGCTCCCATTTTCCCGGT              |
|             | lncRNA:TS8-right HR arm-F  | CACATGGCGCGCCTATAGGAGTGATATTGAACAACCTT       |
|             | lncRNA:TS8-right HR arm-R  | ATGTAGCTCGAGATGACTAGTGGCAAATCCAATAGCATAAC    |
| lncRNA:TS9  | lncRNA:TS9-left HR arm-F   | CATCAAGGTACCCTACATATGGGTCGGAAAGATGAAGCACTCA  |
|             | lncRNA:TS9-left HR arm-R   | AACATGGCGCGCCGACCGCTGGCAAACCAATAGAA          |
|             | lncRNA:TS9-right HR arm-F  | CACATGGCGCGCCTTGCAATTTCCAGCAAGCTTTT          |
|             | lncRNA:TS9-right HR arm-R  | ATGATCACTAGTACCCAAACCAGAAAGAATGTCCG          |
| lncRNA:TS10 | lncRNA:TS10-left HR arm-F  | TGACAAGGTACCGATCATATGTAGCCAACTGAAAGCGACTCCC  |
|             | lncRNA:TS10-left HR arm-R  | TAGTAGGCGGCCGCAAGCTTTGCTCCTCGAAAAGAAAT       |
|             | lncRNA:TS10-right HR arm-F | CACATGGCGCGCCAGCAGGGGCAAAAATTGAAACA          |
|             | lncRNA:TS10-right HR arm-R | ATGATCCTCGAGGCTATTCCTTCTCCGTTTGCTC           |
| lncRNA:TS11 | lncRNA:TS11-left HR arm-F  | CATCTAGGTACCATTGCCATTCGCTTTGCGTTAC           |
|             | lncRNA:TS11-left HR arm-R  | ATGAATGCGCGCCGCGCCAGGGATTACCCCGCCA           |
|             | lncRNA:TS11-right HR arm-F | CTCATAGGCGCGCCCGGAATGCCACATCCTTT             |
|             | lncRNA:TS11-right HR arm-R | AACATGCTCGAGTAGACTAGTTTTGAAAACGAGAAGCAGAGGGT |

|             |                            |                                               |
|-------------|----------------------------|-----------------------------------------------|
|             | lncRNA:TS12-left HR arm-F  | ACTCATGGTACCCTACATATGGGCAACAGAAATAGATGGCAAAG  |
| lncRNA:TS12 | lncRNA:TS12-left HR arm-R  | ATGATGACCGGTACGACACCTTCTAAACTCGGCC            |
|             | lncRNA:TS12-right HR arm-F | CACATGGCGCGCCGTACAGATAAAGTTGAACTGGA           |
|             | lncRNA:TS12-right HR arm-R | ATGATGCTCGAGATGACTAGTCAGCCAAGCCGATTCTTATGC    |
|             | lncRNA:TS13-left HR arm-F  | CATCATGGTACCCTACATATGATTGAGTGGCTTCATTTGTCCG   |
| lncRNA:TS13 | lncRNA:TS13-left HR arm-R  | TAGATGGCGGCCGATAATCTCATCATTTGATGTTGCAG        |
|             | lncRNA:TS13-right HR arm-F | GTCATGGCGCGCTCCGTGGCATTCTCCAGC                |
|             | lncRNA:TS13-right HR arm-R | TACATCCTCGAGTAGACTAGTGCCTTTTCCGCTTGTTCATC     |
|             | lncRNA:TS14-left HR arm-F  | AGCGTGGGTCTCGGGCTAAATCCGTCAAACCAGGAAAGC       |
| lncRNA:TS14 | lncRNA:TS14-left HR arm-R  | GTGCTGGGTCTCACATCAAGAAGTGCCGACCGCTGGAG        |
|             | lncRNA:TS14-right HR arm-F | AGCGTGGGTCTCTTAGCTGAAGGATTGGCGTTGTCATGTC      |
|             | lncRNA:TS14-right HR arm-R | GTGCTGGGTCTCGGAGGTGACCTTGGTGGGGCTAATGATG      |
|             | lncRNA:TS15-left HR arm-F  | CTTCTAGGTACCTGACTTGCTGCGGTCTATCTGC            |
| lncRNA:TS15 | lncRNA:TS15-left HR arm-R  | ATGATGGCGCGCCGATGTTGCTGGAATTACTIONCAACACC     |
|             | lncRNA:TS15-right HR arm-F | GTCATAGGCGCGCCGGTGTGCCAAGAAGGAGA              |
|             | lncRNA:TS15-right HR arm-R | ATGATGACTAGTTAGCCAGTCTCAAACGATG               |
|             | lncRNA:TS16-left HR arm-F  | CATCATGGTACCTCATCTGGAAGTGGTCTATCG             |
| lncRNA:TS16 | lncRNA:TS16-left HR arm-R  | ATGATGGCGCGCCCGAGTCCCGTCCCATCCGT              |
|             | lncRNA:TS16-right HR arm-F | CACATGGCGCGCCCTAGTCGACGCATATGCATACCTCTGATATCG |
|             | lncRNA:TS16-right HR arm-R | ATGATGCTCGAGTTCTGACTTTCACCAATACAA             |
|             | lncRNA:TS17-left HR arm-F  | CATCATGGTACCGTGAGCGAGTGTCTTGGGAATC            |
| lncRNA:TS17 | lncRNA:TS17-left HR arm-R  | ATGATGACCGGTATGGCGCGCGATGGTTAAGGCTTTCCACCTG   |
|             | lncRNA:TS17-right HR arm-F | CACATGGCGCGCCCTAGTCGACAAGTGGTAAACAATACTCCGCT  |
|             | lncRNA:TS17-right HR arm-R | ATGATGACTAGTGAGATTTAGGGAGACAAGGAGC            |
|             | lncRNA:TS18-left HR arm-F  | CATCATGGTACCAGAAATGGAAGCAAAATGGAACG           |
| lncRNA:TS18 | lncRNA:TS18-left HR arm-R  | ATGATGACCGGTATGGCGCGCGCAGGACGAGAAGTATTACGC    |
|             | lncRNA:TS18-right HR arm-F | CACATGGCGCGCCCTAGTCGACAAGTGAACAAGCCTGGAGAT    |
|             | lncRNA:TS18-right HR arm-R | ATGATGCTCGAGGAGGTGTATGGATTTCAGTAAG            |
|             | lncRNA:TS19-left HR arm-F  | CATCATGGTACCTCCTGGTCTATTATCCTTT               |
| lncRNA:TS19 | lncRNA:TS19-left HR arm-R  | CTTCTAATGCGGCCGCTCAGTGACCTGCAAGACATAAAA       |
|             | lncRNA:TS19-right HR arm-F | CATCTAGGCGCGCCATTTGATTTGCCAGTCTCC             |
|             | lncRNA:TS19-right HR arm-R | ATTGAACTAGTCGGTTACTGCGTCATCATCTC              |
|             | lncRNA:TS20-left HR arm-F  | CATCATGGTACCCAGCGCGTGGTGACAGAAATT             |
| lncRNA:TS20 | lncRNA:TS20-left HR arm-R  | ATGATGGCGGCCGCTGCCGCCAGCTCATTATTGTCA          |
|             | lncRNA:TS20-right HR arm-F | CAGGAGCGCGCCCTAGTCGACGAATTAATGGCCATGAAATGTA   |
|             | lncRNA:TS20-right HR arm-R | ATGATGCTCGAGATGACTAGTTCGGAGGGCGATACGCTGTGC    |
|             | lncRNA:TS21-left HR arm-F  | CTACATGGTACCCGGTACTTGGGCTCTTCTGA              |
| lncRNA:TS21 | lncRNA:TS21-left HR arm-R  | ATGATGGCGGCCGCAAAAGACGACAGTTGGCCAAA           |
|             | lncRNA:TS21-right HR arm-F | CACATGGCGCGCCGAACCAGACCTTTCTGTGAATTCTT        |
|             | lncRNA:TS21-right HR arm-R | ATCATCCTCGAGTAGACTAGTGAAACATTCGGTCTCGGGG      |
|             | lncRNA:TS22-left HR arm-F  | CATCATGGTACCCCTTCGCTTCAGTTTCAGTCA             |
| lncRNA:TS22 | lncRNA:TS22-left HR arm-R  | ATGATGACCGGTATGGCGGCCGCAAAACGAAACTAAGTTGACT   |
|             | lncRNA:TS22-right HR arm-F | ATGATGGCGGCCAAAATGGCGGTGCCATGAAAGT            |
|             | lncRNA:TS22-right HR arm-R | ATGATGGTTCGACACACGAGTAAACGAGGGATAG            |
|             | lncRNA:TS23-left HR arm-F  | CATCATGGTACCCTACATATGTGGAGAAAATAGCAATAACAAAGG |
| lncRNA:TS23 | lncRNA:TS23-left HR arm-R  | ATGATGACCGGTATGGCGGCCCTACTCCCGAAGCGTCTTCTT    |
|             | lncRNA:TS23-right HR arm-F | CACATGGCGCGCCCTAGTCGACAGAGGGCTTCTCCGCTTTTGG   |
|             | lncRNA:TS23-right HR arm-R | ATGATGCTCGAGATGACTAGTCGGCGTAAACAATAACAAGAATCG |

|             |                            |                                                 |
|-------------|----------------------------|-------------------------------------------------|
|             | lncRNA:TS24-left HR arm-F  | CATCATGGTACCCTACATATGAGTTCGCTTTGACATCCGCCAC     |
| lncRNA:TS24 | lncRNA:TS24-left HR arm-R  | ATGATGACCGGTATGGCGGCCGTGTGGGGTCACAACCGGAATA     |
|             | lncRNA:TS24-right HR arm-F | CACATGGCGGCCCTAGTCGACTTGAGGCGCCCCCTTCGAGT       |
|             | lncRNA:TS24-right HR arm-R | ATGATGCTCGAGATGACTAGTAACCCAGTTATGTCATCTCCC      |
|             | lncRNA:TS25-left HR arm-F  | CATCATGGTACCCTACATATGTATATTTCGTGAACGGGACACCAG   |
| lncRNA:TS25 | lncRNA:TS25-left HR arm-R  | ATGATGACCGGTATGGCGGCCGTGCGGGTACTTTTGAAAAGGA     |
|             | lncRNA:TS25-right HR arm-F | CACATGGCGGCCCTAGTCGACGGTCCAGTGGATGATACAAATCTTTA |
|             | lncRNA:TS25-right HR arm-R | ATGATGCTCGAGATGACTAGTTTTCGGGGCATCTTCTACTGACT    |
|             | lncRNA:TS26-left HR arm-F  | CATCATGGTACCCTACATATGCTGTTTATCACCATCAGAGGGC     |
| lncRNA:TS26 | lncRNA:TS26-left HR arm-R  | ATGATGACCGGTATGGCGGCCGTGCCATTCCATTTCCACAAC      |
|             | lncRNA:TS26-right HR arm-F | CACATGGCGGCCCTAGTCGACCTTTTCTCTCGCTCTCTGG        |
|             | lncRNA:TS26-right HR arm-R | ATGATGCTCGAGATGACTAGTGAGCAGTTCATTTCGCTGTATT     |
|             | lncRNA:TS27-left HR arm-F  | CATCATGGTACCAACCGCCGAAAGTTAGTGC                 |
| lncRNA:TS27 | lncRNA:TS27-left HR arm-R  | ATTTCGGATGCGGCCGCTTGCCAGATTGATGAACATACCC        |
|             | lncRNA:TS27-right HR arm-F | CATCATGGCGCCCTTGCTTGGTAGTGCTCGAA                |
|             | lncRNA:TS27-right HR arm-R | ATGAGTCTCGAGTACCGCTTCTGGTTTAGTTG                |
|             | CR45302-left HR arm-F      | ACTACTGTGGTACCTTTGCTTGTGAACGTGTTGTGTACC3        |
| CR45302     | CR45302-left HR arm-R      | CAATTCAAGCGGCCGCACTTTTGGCCACGCCCACTCTA          |
|             | CR45302-right HR arm-F     | CTTCTTCTGGCGCCCTTTTCTTTGGATTGGCTGGC             |
|             | CR45302-right HR arm-R     | CAACTACAAGTAGTATACCAACTGCTTGTGGGCGTT            |
|             | CR45727-left HR arm-F      | CACATCAAGGTACCGCGAAACAGACGAACAGCACAA            |
| CR45727     | CR45727-left HR arm-R      | CAATTCAAGCGGCCGACAGTCAATTTGCAGCAGCACT           |
|             | CR45727-right HR arm-F     | CATGTACTGGCGCCCTCATGGAATTCACTTATTAACGCTTA       |
|             | CR45727-right HR arm-R     | CAAGACAACTAGTAAGTGAACCCGAAACAGTGACG             |
|             | CR44949-left HR arm-F      | CACAACAGGTACCAACGCTTGACACAGTTCACGATA            |
| CR44949     | CR44949-left HR arm-R      | CATTTGAAGCGGCCGACGTGACCAGTGTCCCATCTGA           |
|             | CR44949-right HR arm-F     | CTAGTACTGGCGCCGACGGATTTGTCCCTTTTGATA            |
|             | CR44949-right HR arm-R     | CAAGACAAGTCGACAGTGAGGGGAGCCATAAAGTGAA           |
|             | CR44776-left HR arm-F      | CACATGACGGTACCAGATGAAGCGATAATGCCAGGTG           |
| CR44776     | CR44776-left HR arm-R      | CAATTCAAGCGGCCGCAATGTCGTCGCCGCTGAAGCTAT         |
|             | CR44776-right HR arm-F     | CATCTTCAGGCGCCATTGTTATTATGCGTCAGGCAGTTC         |
|             | CR44776-right HR arm-R     | CAATCAGTACTAGTGACAAGGGGAATGTAACAATCAA           |
|             | CR44967-left HR arm-F      | TTCTTCACGGTACCACCACTTGTCCATTGGGTCATAA           |
| CR44967     | CR44967-left HR arm-R      | TCTTTCTTGGCGCCGCTTTTGTGTGCTTCCAGTCTTTG          |
|             | CR44967-right HR arm-F     | ACACTACTGGCGCCGAATCAAGGCTTTTTCTCGCAA            |
|             | CR44967-right HR arm-R     | CTTTCTACGTCGACCAGGATTTTCTTTGGGGTCGTC            |
|             | CR45557-left HR arm-F      | ACTACACTGGTACCGTATTTTGGGTCCACCTTCACTG           |
| CR45557     | CR45557-left HR arm-R      | CTTTTACAGCGCCGCATGTTTTACACTTGGGTCATTTACT        |
|             | CR45557-right HR arm-F     | GTATCTATGGCGCCGACAAGTGACAGCCGTATCGCAGCA         |
|             | CR45557-right HR arm-R     | CTCAATCGACTAGTAACATCTACGGGGACTCAAAGGC           |
|             | CR45242-left HR arm-F      | CACTTGAAGGTACCCAGTTAGAGGGGAACACAATGGC           |
| CR45242     | CR45242-left HR arm-R      | CTATACTAGCGCCGACGACTTTACGCGACCATGTCTG           |
|             | CR45242-right HR arm-F     | CATCTATCGGCGCCCTGGCAGCATATTTACACTCAA            |
|             | CR45242-right HR arm-R     | GAACACAACTAGTAATGCCAGTGATTGACCATATTCAT          |
|             | CR44874-left HR arm-F      | CACATTTCCGGTACCATCCAACCTGCTAACCAAGT             |
| CR44874     | CR44874-left HR arm-R      | GTTACACAGCGCCGCAAACGTTGTCCACCCGTA               |
|             | CR44874-right HR arm-F     | CATCAACTGGCGCCCTCAACCAAGATGCCGAGACACTT          |
|             | CR44874-right HR arm-R     | GAAACAACACTAGTCGGCGAAGATTCCAACCTACCT            |



|                     |                          |                                           |
|---------------------|--------------------------|-------------------------------------------|
|                     | CR45418-left HR arm-F    | CACATCAAGGTACCGAAGGAAAAACCCTACGCAACAT     |
| CR45418             | CR45418-left HR arm-R    | AGTACTATGCGGCCGCGGTCTGTGCTCAAAGTTTCTATGC  |
|                     | CR45418-right HR arm-F   | CACACATTGGCGCGCCTGCGGACACGAACAGTTTTTAC    |
|                     | CR45418-right HR arm-R   | TGCTTTAGACTAGTAAGTGACCAAGAGGCTGGATGTT     |
|                     | CR44278-left HR arm-F    | CACATCATGGTACCTCTTTTCGCCACATCCACTTAT      |
| CR44278             | CR44278-left HR arm-R    | ACTCAATTGCGGCCGCTGGGATACCATACCACCTAGTGAC  |
|                     | CR44278-right HR arm-F   | ACTAACTTGGCGGCCGCTGGGGAATTGAATTTACTGAA    |
|                     | CR44278-right HR arm-R   | TGCTTTAGACTAGTAGGTATTTTTGAGGGCTTTTTCG     |
|                     | CR45670-left HR arm-F    | CTTCTCAAGGTACCGCTGCTTTGTTTACACTCGCCA      |
| CR45670             | CR45670-left HR arm-R    | ACTCACAAGCGGCCGAATGGCTGGCGAAATCTTCAA      |
|                     | CR45670-right HR arm-F   | ACATTCAAGGCGCGCCAGCCACCATTTACGGTCATTA     |
|                     | CR45670-right HR arm-R   | CTTTCAACGTGCAAACTATCCAGCAAGGCGGTG         |
|                     | CR45054-left HR arm-F    | CTCAATTGGGTACCATGCGACCGTTACAAAGTGCCTA     |
| CR45054             | CR45054-left HR arm-R    | TCTCTCTTGCGGCCGCTTATTGCTTCCAGGACTTCTTCTA  |
|                     | CR45054-right HR arm-F   | TCATTCTAGGCGGCCATTTGGCTTCTGCACAAGATATTC   |
|                     | CR45054-right HR arm-R   | TCTGACAAACTAGTAAAACTGACGAAATGGGCG         |
|                     | CR44455/6-left HR arm-F  | AGCGTGGGTCTCGGGCTTGTGTATTCTATTTGCCAAGCGG  |
| CR44455/CR444<br>56 | CR44455/6-left HR arm-R  | GTGCTGGGTCTCACATCAGTTTTCGGCTTTGCGATTTGTC  |
|                     | CR44455/6-right HR arm-F | AGCGTGGGTCTTTAGCCAAAGGAGCACTTGAAGTGCAGC   |
|                     | CR44455/6-left HR arm-F  | GTGCTGGGTCTCGGAGGACGCTGCTCGGAAAAGTCAAG    |
|                     | CR44943-left HR arm-F    | GTTCATTCCGTACCATCACCTGGCATTGTTGAGTAA      |
| CR44943             | CR44943-left HR arm-R    | TGTCTCAAGCGGCCGCAAAGTCGTTGTTGCCAACTAGCA   |
|                     | CR44943-right HR arm-F   | ACACTCATGGCGCGCCTTTGCCAAAGTTCAGTTGATTCT   |
|                     | CR44943-right HR arm-R   | TGCTTTCTACTAGTTTTGAGTGTCCAAGTGGGTGTT      |
|                     | CR44401-left HR arm-F    | ACTCTCTAGGTACCATCCCCTGACATCTGACGAAATA     |
| CR44401             | CR44401-left HR arm-R    | TCACAAAAGCGGCCGCCAACCACTACTTATCCGAAAA     |
|                     | CR44401-right HR arm-F   | GTTCACATGGCGCGCCGAATGTAGTTCCTCCACTCG      |
|                     | CR44401-right HR arm-R   | ACTGACACACTAGTAAAGAAAAAGACCGATGGCACTG     |
|                     | CR45283-left HR arm-F    | ACTCTCTAGGTACCTTTGCTTCCATCTCCATCAG        |
| CR45283             | CR45283-left HR arm-R    | GTACTTTAGCGGCCG ATTGTATGTTAGGCGGGTTGAAG   |
|                     | CR45283-right HR arm-F   | CTATCACAGGCGGCCCAACCATCTCTAATCACATC       |
|                     | CR45283-right HR arm-R   | GAACAAACTACTAGTCAGGCAGGTCAGATGGAGAATAC    |
|                     | CR43356-left HR arm-F    | ACTCTCAGGTACCAATTCACATTTACATCGTGAGGGA     |
| CR43356             | CR43356-left HR arm-R    | GTACTACTGCGGCCCTATGCTTTCTATTGTGTTTCA      |
|                     | CR43356-right HR arm-F   | CTATACCAGGCGGCCATTGCCAACTTTTCCAAATAG      |
|                     | CR43356-right HR arm-R   | TGTTCTTTGGCGCGCCTGGTTTGTGTCTAGGATAATGC    |
|                     | CR44805-left HR arm-F    | ACTCTACTGGTACCTAATATCCCTGAAAACCGAATGC     |
| CR44805             | CR44805-left HR arm-R    | GACACATAGCGGCCGCAAATGAAGTTTCTGTTTGTGGTGTG |
|                     | CR44805-right HR arm-F   | CTATGTCTGGCGCGCGTTGAGTCCCTCAAACCAAATTGA   |
|                     | CR44805-right HR arm-R   | AGACATACTACTAGTTGGAGAAGGAGGCAAAGGAACAG    |
|                     | CR45630-left HR arm-F    | CATTGTCTGGTACCTGGGGTTCTTTGCTGACTGCT       |
| CR45630             | CR45630-left HR arm-R    | TCAGTCAAGCGGCCGCACATAAAGGAGCCATTTTTG      |
|                     | CR45630-right HR arm-F   | GACTACATGGCGGCCGCAAGGAAGAAGAAAAGGATTTC    |
|                     | CR45630-right HR arm-R   | ACTGACACGTCGACTCCATCCACCCTCGTTACTTGTG     |
|                     | CR43764-left HR arm-F    | ACTCTCAAGGTACCACGTTACCCGAAAATTCACTGAT     |
| CR43764             | CR43764-left HR arm-R    | CTACATTTGGCGGCCGTTTTACGAGCTCATTGGAAGTGC   |
|                     | CR43764-right HR arm-F   | CATCACAAGGCGGCCACCCACACAATGCGAGAAGTTA     |
|                     | CR43764-right HR arm-R   | ACTCATTCACTAGTTGGGCTCTGTAGGCTCATATTT      |

|               |                                  |                                             |
|---------------|----------------------------------|---------------------------------------------|
|               | CR43701-left HR arm-F            | CATCTCTTGGTACCGTAACCCCTTTTATTCGCAGTG        |
| CR43701       | CR43701-left HR arm-R            | CAACACAAGCGGCCGCAAACCTGAACTGCCTCCAAAAGAG    |
|               | CR43701-right HR arm-F           | GCATAGATGGCGCGCCAGAGATACTCCGGATA            |
|               | CR43701-right HR arm-R           | CTTTCATCGTCGACAGGGTCTTTGGTCTTACACTTCC       |
|               | CR44371-left HR arm-F            | GAGTCACGGTACCCTCGCAGAGATTTGTCGGTGTG         |
| CR44371       | CR44371-left HR arm-R            | CTCTTTCTGCGGCCGCTTCTGCTGGTGTCTGTGGGTGTA     |
|               | CR44371-right HR arm-F           | CTACATTCGGCGCCCTTGCCACTAAAAGTCTCCGTTGG      |
|               | CR44371-right HR arm-R           | TCTGTCATACTAGTGATTTGATTTGAGTGTCTCCGCA       |
|               | CR42657-left HR arm-F            | CTCTTATGGTACCGATTCTCTCTCTTTTGCATT           |
| CR42657       | CR42657-left HR arm-R            | CAATTCTTGGCGCCGCTGAGGGTTTTGCTTGTGGGTC       |
|               | CR42657-right HR arm-F           | TTTCTACTGGCGCCCTCATTTCGACACCCCATTTATGC      |
|               | CR42657-right HR arm-R           | ACTCACACTAGTAATCCGAAAGCGAGAATGTCAGA         |
|               | CR45187-left HR arm-F            | CATCACTGGTACCCTAAGTCTTTCCAACGCCGTAACA       |
| CR45187       | CR45187-left HR arm-R            | CACTTTCTGCGGCCGCTTGGCAAATCGATAGAAAATTTT     |
|               | CR45187-right HR arm-F           | GAACACATGGCGCCGAAAAAAGATGATGGACTTGC         |
|               | CR45187-right HR arm-R           | CTTTCACGTCGACGTTTTTGTAGGGGAGGTTGACTG        |
|               | CR43859-left HR arm-F            | GATTCAAGGTACCGTCCGAGCAGGATATCTCCAAC         |
| CR43859       | CR43859-left HR arm-R            | CTAGAACAGCGCCGCATGAGAACAATAACTTGGTGCC       |
|               | CR43859-right HR arm-F           | GATCACATGGCGGCCCAACTCAATTTTCACTTCGCA3' ASCI |
|               | CR43859-right HR arm-R           | ACTGAGACACTAGTGCATTTGGTAAACCCCTGGA          |
|               | CR43492-left HR arm-F            | CACTTATGGTACCTCTTCAGGAGAACGCCCGTAT          |
| CR43492       | CR43492-left HR arm-R            | CTCTACTAGCGCCGCGCCACTCCTACGCCATTGA          |
|               | CR43492-right HR arm-F           | CTTCACAAGGCGCGCCACCCTCCACTCCACTCCACTC       |
|               | CR43492-right HR arm-R           | ACCAACACACTAGTGTCCATCGGAACTCCATCTC          |
|               | CR45722/3/CR43839-left HR arm-F  | CTCTTCTGGTACCGTTCGTTTCTTTGGATGCTTGAT        |
| CR45722/CR457 | CR45722/3/CR43839-left HR arm-R  | CTTCAATTGCGGCCGCTGAGCCAAAAGGTCTAAGTGTGC     |
| 23/CR43839    | CR45722/3/CR43839-right HR arm-F | CTTCTCAAGGCGGCCAATGCTCCAAGTTCCCTGG          |
|               | CR45722/3/CR43839-right HR arm-R | ACTCACACTAGTAACACCCAAAACACGAAATCAGAA        |
|               | CR45608-left HR arm-F            | GAAAACCAGGTACCCTGAAATGGGAAGTGGGCGAG         |
| CR45608       | CR45608-left HR arm-R            | CTACAATTGCGGCCGCTGGGCATATTTGACATAGGGATG     |
|               | CR45608-right HR arm-F           | GTTCTCTTGGCGCCCTTTTGGGATTTATTGAGTATTCAGC    |
|               | CR45608-right HR arm-R           | GTTTCTCAGTCGACGTTTGGGGTATTGTGTTGCCTTC       |
|               | CR45174-left HR arm-F            | GAGCATCAGGTACCGTGAAGTAGGTCGTTGCCACAGT       |
| CR45174       | CR45174-left HR arm-R            | CTACAAGAGCGGCCGAAAATGGTGTCTACCCCTGAAC       |
|               | CR45174-right HR arm-F           | CAGTACATGGCGGCCGAAAATGACAAAGCCTTAGTTGAC     |
|               | CR45174-right HR arm-R           | TCTGTGTTACTAGTCGCTGTTACTGCTGAGTATTG         |
|               | CR44585-left HR arm-F            | CATCATCATATGTCCCAGTCCCAGGTCCA               |
| CR44585       | CR44585-left HR arm-R            | CTTCTTATGCGGCCGCGGCTCCTAACTGGATGGTGA        |
|               | CR44585-right HR arm-F           | CACATGGCGCCGCTTTTGGTGGTGAACGATTTA           |
|               | CR44585-right HR arm-R           | ATGATGCTCGAGAGTGCCGTGAATGAAGGGT             |
|               | CR45542-left HR arm-F            | CATCATGGTACCAGACAGAAACAGAGGGATAGAA          |
| CR45542       | CR45542-left HR arm-R            | ATGATGACCGGTATGGCGGCCGCTTTTGGTGGTCTCTGTTGTT |
|               | CR45542-right HR arm-F           | CACATGGCGGCCGCGATTTGACTCGTCGACCGCA          |
|               | CR45542-right HR arm-R           | ATGATGCTCGAGATGACTAGTGGGAAAGAGCCAGCGATTGTTA |
|               | CR17567-left HR arm-F            | CATCATGGTACCATTGCCGTGGGCGTCGCTCTT           |
| CR17567       | CR17567-left HR arm-R            | ATTCGGATGCGGCCGCAACCTGCTTGGTGGAGACA         |
|               | CR17567-right HR arm-F           | CATCTAGGCGGCCCATTTCCGCTCAGTCTGTTAC          |
|               | CR17567-right HR arm-R           | AGTAGTACTAGTACCGCACTGAACCGCATCGC            |

|         |                        |                                               |
|---------|------------------------|-----------------------------------------------|
|         | CR32661-left HR arm-F  | CATCATGGTACCTTGTCCACTTGACCGCACTG              |
| CR32661 | CR32661-left HR arm-R  | ATTCGAATGCGGCCGCTTCATCTGGGAGGTTGTTA           |
|         | CR32661-right HR arm-F | CATCTAGGCGCGCCACATGGATTGACAGCTCCGTTTG         |
|         | CR32661-right HR arm-R | AGTATGCTCGAGAGACCTGGATGGTTGATTAA              |
|         | CR9284-left HR arm-F   | CTAGTAGGTACCGCAACTTGTAGGGCTATGGAG             |
| CR9284  | CR9284-left HR arm-R   | ATTCATTCGCGGCCGCTACTGGGATTCAAAAAAC            |
|         | CR9284-right HR arm-F  | CATCTAGGCGCGCCACAATAGGCTGCTCAAACG             |
|         | CR9284-right HR arm-R  | GATAGTCTCGAGGTTCCCATACCCATTCCAT               |
|         | CR42858-left HR arm-F  | CATCATGGTACCTTACAAGGCATCCGATTCAA              |
| CR42858 | CR42858-left HR arm-R  | GAATGAATGCGGCCGCCAGACACGAACGGGTATGAAAA        |
|         | CR42858-right HR arm-F | GTACTAGGCGCGCCCTGCGTTCTTGTAGCGATTTG           |
|         | CR42858-right HR arm-R | AGTATCCTCGAGAGACCTGTCTGGCATTTTG               |
|         | CR43823-left HR arm-F  | CATCATGGTACCCTACATATGAATGAGATTTCTTTCGGGGAGC   |
| CR43823 | CR43823-left HR arm-R  | ATGATGACCGGTATGGCGGCCGCGGGACCACGGACTTGTAGCACT |
|         | CR43823-right HR arm-F | CACATGGCGCGCCCTAGTCGACCAAAAGGTCACAGTTACACGC   |
|         | CR43823-right HR arm-R | ATGATGCTCGAGATGACTAGTTCTCACAGGGTGAAGTGGGTA    |
|         | CR43484-left HR arm-F  | CATCATGGTACCCTACATATGGGTGTTGTATGTGGCTGCTTGT   |
| CR43484 | CR43484-left HR arm-R  | ATGATGACCGGTATGGCGGCCGCGGGCCTGCTACAACGACATT   |
|         | CR43484-right HR arm-F | CACATGGCGCGCCCTAGTCGACTGGCATCTTGGAGGTAAGTGGAA |
|         | CR43484-right HR arm-R | ATGATGCTCGAGATGACTAGTGGCAGAGATTGTGGTAAGTATGG  |
|         | CR43862-left HR arm-F  | CATCATGGTACCCTACATATGTCTTCGGCTCCCTCCAATCT     |
| CR43862 | CR43862-left HR arm-R  | ATGATGACCGGTATGGCGGCCGCTCACACTTGGCGCCCTCTC    |
|         | CR43862-right HR arm-F | CACATGGCGCGCCCTAGTCGACGAACGGGGCAAGCAAAAAAA    |
|         | CR43862-right HR arm-R | ATGATGCTCGAGATGACTAGTTTGAATGGACTTTCTTTTGGGC   |
|         | CR43608-left HR arm-F  | CATCATGGTACCCTACATATGTGGCTGACGACTCCACCTC      |
| CR43608 | CR43608-left HR arm-R  | ATGATGACCGGTATGGCGGCCGCTCTGGCACTCTGGTTCCCC    |
|         | CR43608-right HR arm-F | CACATGGCGCGCCCTAGTCGACATTTCCCGGCTTCCCACTG     |
|         | CR43608-right HR arm-R | ATGATGCTCGAGATGACTAGTCAACACTTGACAGCCAAACGATA  |
|         | CR43852-left HR arm-F  | CATGGTACCCCGAATGCCAAATGAAGATGC                |
| CR43852 | CR43852-left HR arm-R  | GAATGCGGCCGCTTTTGATTGATTGAATCATAGT            |
|         | CR43852-right HR arm-F | ATGGCGCGCAAATCTGCTGGCCAGTAAAAG                |
|         | CR43852-right HR arm-R | ATGCTCGAGTTTCTCAAACAGGCGGCACG                 |
|         | CR43718-left HR arm-F  | CATCATGGTACCCCATCTATTCTTCTGGGATT              |
| CR43718 | CR43718-left HR arm-R  | ATGATGACCGGTGGGTGGCGCAGTCTGAAC                |
|         | CR43718-right HR arm-F | CACATGGCGCGCCCAACGAAATCACAAATTTTTTTT          |
|         | CR43718-right HR arm-R | ATGATGCTCGAGTGAGATTAGTTGTGCCAGTTT             |
|         | CR43282-left HR arm-F  | ATGATGACCGGTAAAATCGGAGCATCCAACG               |
| CR43282 | CR43282-left HR arm-R  | ATGGCGGCCGCAAATAAATATTTAAAACAACCTCCT          |
|         | CR43282-right HR arm-F | CACATGGCGCGCCAGAATATTTTCAGCGCTTTTT            |
|         | CR43282-right HR arm-R | CTAGTCGACCCGCTGTCTGTGTGGC                     |
|         | CR42859-left HR arm-F  | CATCATGGTACCTCGTATGTGACTGGAGCAAG              |
| CR42859 | CR42859-left HR arm-R  | ATGGCGGCCGCTCGTATCCGAATCATCAT                 |
|         | CR42859-right HR arm-F | CACATGGCGGCCATCCGGCACTTCTGTGTGC               |
|         | CR42859-right HR arm-R | ATGATGCTCGAGAAGAGCGACTAAAGCCACA               |
|         | CR43416-left HR arm-F  | CATGGTACCCTCCGACAGCTGGCACT                    |
| CR43416 | CR43416-left HR arm-R  | GAATGGCGGCCGCTCTCTGCTTCGTTCC                  |
|         | CR43416-right HR arm-F | CACATGGCGCGCCGCTCTTTGCGAATTTTCTC              |
|         | CR43416-right HR arm-R | ATGATGCTCGAGATTCGCATCTTCAACG                  |

|                                         |                                      |                                              |
|-----------------------------------------|--------------------------------------|----------------------------------------------|
|                                         | CR43631/2/3/4/CR43847-left HR arm-F  | CATCATGGTACCAGCAGCCAGCAAGGACC                |
| CR43631/CR43632/CR43633/CR43634/CR43847 | CR43631/2/3/4/CR43847-left HR arm-R  | ATGGCGGCCGCGAAAGTTGAACAATAAAATGG             |
|                                         | CR43631/2/3/4/CR43847-right HR arm-F | CACATGGCGCCTCTCGGGACTTGACAGCATC              |
|                                         | CR43631/2/3/4/CR43847-right HR arm-R | CTAGTCGACGCTCAAGACCCTTACCG                   |
|                                         | CR42645-left HR arm-F                | CATGGTACCTCCCAAATCCCAGCCTCC                  |
| CR42645                                 | CR42645-left HR arm-R                | CTAACCGGTTCCAGAAAGATGTTTTCCGAG               |
|                                         | CR42645-right HR arm-F               | ATTGGCGCGCCGAAATTAAGTGTGAAAAGTG              |
|                                         | CR42645-right HR arm-R               | GGACTAGTCCCAATGAATACATCCAGGACA               |
|                                         | CR43705/6-left HR arm-F              | AGCGTGGGTCTCGGGCTCGACTGAGGCTGAGTTGGGAAA      |
| CR43705/CR43706                         | CR43705/6-left HR arm-R              | GTGCTGGGTCTCACATCACTGGCGAACAAGTAAATGTTATC    |
|                                         | CR43705/6-right HR arm-F             | AGCGTGGGTCTCTTAGCAAAAAGACGGCTGTTTCTCACCA     |
|                                         | CR43705/6-right HR arm-R             | GTGCTGGGTCTCGGAGCCGATTTGCTCTACTCCCTGG        |
|                                         | CR43848-left HR arm-F                | AGCGTGGGTCTCGGGCTCTACACTGCCGACGATACGAAAA     |
| CR43848                                 | CR43848-left HR arm-R                | GTGCTGGGTCTCACATCTTGGGTTGTTATTATCCTTGTGTGTTG |
|                                         | CR43848-right HR arm-F               | AGCGTGGGTCTCTTAGCAAAAATAGGGGACGAAAAAGCA      |
|                                         | CR43848-right HR arm-R               | GTGCTGGGTCTCGGAGGCCGCATCTGTATTTGACTTTGG      |
|                                         | CR43835-left HR arm-F                | AGCGTGGGTCTCGGGCTGAACAAAAACACCAGACAAGC       |
| CR43835                                 | CR43835-left HR arm-R                | GTGCTGGGTCTCACATCGGATCTGGTTGTTCACTGAATTTTG   |
|                                         | CR43835-right HR arm-F               | AGCGTGGGTCTCTTAGCTGCCGTGCATAATTTCTAATACCC    |
|                                         | CR43835-right HR arm-R               | GTGCTGGGTCTCGGAGGTTTCAACTGGTTTCTGATTCGGA     |
|                                         | CR43304-left HR arm-F                | AGCGTGGGTCTCGGGCTCTAAAAAATGTTGCCAGCCTTG      |
| CR43304                                 | CR43304-left HR arm-R                | GTGCTGGGTCTCACATCGCGAAGCATAACGAGACTGTGAA     |
|                                         | CR43304-right HR arm-F               | AGCGTGGGTCTCTTAGCGTTCGCCGTGGTGTCCCTT         |
|                                         | CR43304-right HR arm-R               | GTGCTGGGTCTCGGAGCGAAAAATGGTGAACCGAAC         |
|                                         | CR43802-left HR arm-F                | AGCGTGGGTCTCGGGCTAGGGGGAAAAATAAAGAAAAGGC     |
| CR43802                                 | CR43802-left HR arm-R                | GTGCTGGGTCTCACATCGCGAAATTAACAACCACACCAT      |
|                                         | CR43802-right HR arm-F               | AGCGTGGGTCTCTTAGCTTTTCCCGCTTCCACACTGA        |
|                                         | CR43802-right HR arm-R               | GTGCTGGGTCTCGGAGGTTCCAGGCAGCGAGTTTTAGT       |
|                                         | CR43414-left HR arm-F                | AGCGTGGGTCTCGGGCTGTAACCCCGAGAAATACGAAA       |
| CR43414                                 | CR43414-left HR arm-R                | GTGCTGGGTCTCACATCGGCACATGACGATTTCCACG        |
|                                         | CR43414-right HR arm-F               | AGCGTGGGTCTCTTAGCTCATTTGACACCAGCGCTTTG       |
|                                         | CR43414-right HR arm-R               | GTGCTGGGTCTCGGAGGCAGTGGAGCAAAAACAAAAGCCTA    |
|                                         | CR43306-left HR arm-F                | AGCGTGGGTCTCGGGCTCGTTGGGATTTGCGATTTTCATC     |
| CR43306                                 | CR43306-left HR arm-R                | GTGCTGGGTCTCACATCGTGTGGGAATGCTGTTTGTATGC     |
|                                         | CR43306-right HR arm-F               | AGCGTGGGTCTCTTAGCTTCTGGCTCCTTCTGGCTGCT       |
|                                         | CR43306-right HR arm-R               | GTGCTGGGTCTCGGAGGTTCCAAGCTACATCTCAATCCG      |
|                                         | CR43807-left HR arm-F                | AGCGTGGGTCTCGGGCTCAGAGACCTTCACTTGGTTCCGCT    |
| CR43807                                 | CR43807-left HR arm-R                | GTGCTGGGTCTCACATCACTTGCCAGCCCATAGAATCAA      |
|                                         | CR43807-right HR arm-F               | AGCGTGGGTCTCTTAGCGCCTCTCGTGCTTCCCGCTT        |
|                                         | CR43807-right HR arm-R               | GTGCTGGGTCTCGGAGGAAAGCCTTCAAAGTGGCGATAC      |
|                                         | CR43655-left HR arm-F                | AGCGTGGGTCTCGGGCTACTTTTACGACAGCCAGCCAGAG     |
| CR43655                                 | CR43655-left HR arm-R                | GTGCTGGGTCTCACATCTTGTCTGCGAGCCTACTCCTA       |
|                                         | CR43655-right HR arm-F               | AGCGTGGGTCTCTTAGCACAAAAACCAGAACCCGATGAG      |
|                                         | CR43655-right HR arm-R               | GTGCTGGGTCTCGGAGGCTCTTGTCCAATCTTATCGCT       |
|                                         | CR43753-left HR arm-F                | AGCGTGGGTCTCGGGCTCTGGAGCGAAGCCAAGTAATAA      |
| CR43753                                 | CR43753-left HR arm-R                | GTGCTGGGTCTCACATCAGAGGGCAATGGCTGGCCGA        |
|                                         | CR43753-right HR arm-F               | AGCGTGGGTCTCTTAGCGAAAGCCTTGCACTTGATAAGAA     |
|                                         | CR43753-right HR arm-R               | GTGCTGGGTCTCGGAGGTTATGTTTGTGGAATGGCTGGAC     |

|               |                          |                                             |
|---------------|--------------------------|---------------------------------------------|
|               | CR43434-left HR arm-F    | AGCGTGGGTCTCGGGCTCGTTACCCACCCACCGTATTCC     |
| CR43434       | CR43434-left HR arm-R    | GTGCTGGGTCTCACATCAGTTGCCTTGTGCCCCAGTG       |
|               | CR43434-right HR arm-F   | AGCGTGGGTCTCTTAGCAGACTTTGTGTCTTTGTCTAATGG   |
|               | CR43434-right HR arm-R   | GTGCTGGGTCTCGGAGCGGCGTTGCGATTTATTGTGA       |
|               | CR43486/7-left HR arm-F  | AGCGTGGGTCTCGGGCTAGTGACTGAAGACGGCAGAAGCA    |
| CR43486/CR434 | CR43486/7-left HR arm-R  | GTGCTGGGTCTCACATCCCTGCAGCTCATCTCCGGAC       |
| 87            | CR43486/7-right HR arm-F | AGCGTGGGTCTCTTAGCAGAGAAGTGGAAAAATCGGAGC     |
|               | CR43486/7-right HR arm-R | GTGCTGGGTCTCGGAGGAGAAGAGGTTGGAGAGTCGCTGG    |
|               | CR43622-left HR arm-F    | AGCGTGGGTCTCGGGCTCAAAGGAAAACTGCCACAGGATG    |
| CR43622       | CR43622-left HR arm-R    | GTGCTGGGTCTCACATCAGCGGGCGTGTGAGAAATGT       |
|               | CR43622-right HR arm-F   | AGCGTGGGTCTCTTAGCATGGGCAACAGCCTGTTG         |
|               | CR43622-right HR arm-R   | GTGCTGGGTCTCGGAGGTCGCTTGTCCGATAAACTTGAA     |
|               | CR43625-left HR arm-F    | AGCGTGGGTCTCGGGCTAAAACCGAAACCGCTTCATCAG     |
| CR43625       | CR43625-left HR arm-R    | GTGCTGGGTCTCACATCGAGTAGTTTCGGAAGCGTGTGAG    |
|               | CR43625-right HR arm-F   | AGCGTGGGTCTCTTAGCAGTACAGAGTCATTGCTGGGGAA    |
|               | CR43625-right HR arm-R   | GTGCTGGGTCTCGGAGGTTGGCTCACAAAACTTTACGA      |
|               | CR43627-left HR arm-F    | AGCGTGGGTCTCGGGCTAAATGCGTAAAAATGTGCCAAAAG   |
| CR43627       | CR43627-left HR arm-R    | GTGCTGGGTCTCACATCGCTGTATAAACAAGATACTGGC     |
|               | CR43627-right HR arm-F   | AGCGTGGGTCTCTTAGCAAATGCGAAACCGACCACTGAAAG   |
|               | CR43627-right HR arm-R   | GTGCTGGGTCTCGGAGGTTATGTCGTGGACTCTGGCACTG    |
|               | CR43682-left HR arm-F    | AGCGTGGGTCTCGGGCTATGTTCCAAAATCGGGTAAAAG     |
| CR43682       | CR43682-left HR arm-R    | GTGCTGGGTCTCACATCTGGATAAACTGCCTCCATTCCA     |
|               | CR43682-right HR arm-F   | AGCGTGGGTCTCTTAGCTGGCGGTTTTGGCTACTTGG       |
|               | CR43682-right HR arm-R   | GTGCTGGGTCTCGGAGGACCGTCTGAGTCTTACCCTTG      |
|               | CR45006-left HR arm-F    | GTTCTAGGTACCTGAACTAAGCGAGCAGGTGAAAT         |
| CR45006       | CR45006-left HR arm-R    | AGTATCGCGGCCGCTCGGCGGACAGCGACAATAT          |
|               | CR45006-right HR arm-F   | CACATGGCGCCCTACGATTCCGGTTAGCAATAGTTA        |
|               | CR45006-right HR arm-R   | ATGATGCTCGAGGAGTTGGTCAGCGGAGATAG            |
|               | CR44852-left HR arm-F    | CTCAGC GGTACCAACATAAACGCCCTCCTTCCTC         |
| CR44852       | CR44852-left HR arm-R    | AGTAAG GCGGCCGCTAACAGTGGCTGAAGCGGATAT       |
|               | CR44852-right HR arm-F   | CTGTCGGCGCCCTGTTCTCCAATACCCTGCAC            |
|               | CR44852-right HR arm-R   | TTGTTG GTCGACATTTCTGTTTCGCCTTCCTTT          |
|               | CR44670/1-left HR arm-F  | AGCGTGGGTCTCGGGCTCTAGTCATCCGTTGGTCAGCATT    |
| CR44670/CR446 | CR44670/1-left HR arm-R  | GTGCTGGGTCTCACATCCTGAATTCAAATTTGCCCGCTAA    |
| 71            | CR44670/1-right HR arm-F | AGCGTGGGTCTCTTAGCTTTTTGAGTGTTTGCTTGTGCGCT   |
|               | CR44670/1-right HR arm-R | GTGCTGGGTCTCGGAGGTCGAGCAAAAGTTGTTGTGTAGGTG  |
|               | CR44420-left HR arm-F    | AGCGTGGGTCTCGGGCTACTGCGACTGCCTTTTGTCTTG     |
| CR44420       | CR44420-left HR arm-R    | GTGCTGGGTCTCACATCTCTCCGCTTGTCTCCGAAAT       |
|               | CR44420-right HR arm-F   | AGCGTGGGTCTCTTAGCTTGACCACACTGACAGGTTAGCA    |
|               | CR44420-right HR arm-R   | GTGCTGGGTCTCGGAGGATTTGTGCTCTACACCTCTGGA     |
|               | CR44413-left HR arm-F    | AGCGTGGGTCTCGGGCTGCTCGCCTTCTCTCATTCTTTC     |
| CR44413       | CR44413-left HR arm-R    | GTGCTGGGTCTCACATCGTTGCCAAAGTATTTGCGAGCCT    |
|               | CR44413-right HR arm-F   | AGCGTGGGTCTCTTAGCTTTCCGGTGGTCTTTTGTCTTTTACA |
|               | CR44413-right HR arm-R   | GTGCTGGGTCTCGGAGGCGCAGGTCAAATGTGAGCAAAA     |
|               | CR44412-left HR arm-F    | AGCGTGGGTCTCGGGCTGTTCAAACTTTTCCCACTTCCC     |
| CR44412       | CR44412-left HR arm-R    | GTGCTGGGTCTCACATCAACAAAAAGAGAATTCCTGATCGAT  |
|               | CR44412-right HR arm-F   | AGCGTGGGTCTCTTAGCAATGACTTTTGCAGCGAGCAGA     |
|               | CR44412-right HR arm-R   | GTGCTGGGTCTCGGAGGCATAACAATGTCCGCGTCA        |

|         |                        |                                               |
|---------|------------------------|-----------------------------------------------|
|         | CR44344-left HR arm-F  | AGCGTGGGTCTCGGGCTATTGCCAGCCTATAAAGCTCCTAAT    |
| CR44344 | CR44344-left HR arm-R  | GTGCTGGGTCTCACATCTTTTGGTTAACTCAATAACTCGGATAT  |
|         | CR44344-right HR arm-F | AGCGTGGGTCTCTTAGCCGCATATGCAACACCATCCACCA      |
|         | CR44344-right HR arm-R | GTGCTGGGTCTCGGAGGTTCTCGGTTACATCGGCAGTTTC      |
|         | CR44337-left HR arm-F  | AGCGTGGGTCTCGGGCTAATCAATAAGCGAGCAAATGGC       |
| CR44337 | CR44337-left HR arm-R  | GTGCTGGGTCTCACATCGCTAACTTTATGCCCTTCAAGC       |
|         | CR44337-right HR arm-F | AGCGTGGGTCTCTTAGCAAACATCAACACGACCAGAATGATA    |
|         | CR44337-right HR arm-R | GTGCTGGGTCTCGGAGGTTGACATGAGTCTGCCAGGGAGT      |
|         | CR44324-left HR arm-F  | AGCGTGGGTCTCGGGCTACCTTAGACAGCGGAGGATACTCA     |
| CR44324 | CR44324-left HR arm-R  | GTGCTGGGTCTCACATCGAACAATTAATAATCCAGCCAGTAG    |
|         | CR44324-right HR arm-F | AGCGTGGGTCTCTTAGCGACAACCCGAGCAGATCCACC        |
|         | CR44324-right HR arm-R | GTGCTGGGTCTCGGAGGCAAAAAGCCAGAGAGAAAATACGAC    |
|         | CR44279-left HR arm-F  | AGCGTGGGTCTCGGGCTTGGAATGGCTATTGGTTCTGTGT      |
| CR44279 | CR44279-left HR arm-R  | GTGCTGGGTCTCACATCTTTTTCCGCCTCCTTCCCTTTAT      |
|         | CR44279-right HR arm-F | AGCGTGGGTCTCTTAGCATCAAACATTTTTTTTTCTCGCCG     |
|         | CR44279-right HR arm-R | GTGCTGGGTCTCGGAGGTTTTGTTGATGGATTTTCGCCG       |
|         | CR44256-left HR arm-F  | AGCGTGGGTCTCGGGCTTTTCTTTTCGTAAGCTGATTTAAGC    |
| CR44256 | CR44256-left HR arm-R  | GTGCTGGGTCTCACATCGCTTGAATCTCCTTGATATTTGTT     |
|         | CR44256-right HR arm-F | AGCGTGGGTCTCTTAGCTGTGTATATCTGCTTTTTCCGTT      |
|         | CR44256-right HR arm-R | GTGCTGGGTCTCGGAGGCTCCTCTGCTACTTTTTGGTTTCC     |
|         | CR44131-left HR arm-F  | AGCGTGGGTCTCGGGCTAGTAGGGTCAGGTCTGTGGGC        |
| CR44131 | CR44131-left HR arm-R  | GTGCTGGGTCTCACATCATTGCGGTAGCATAACGATTTCA      |
|         | CR44131-right HR arm-F | AGCGTGGGTCTCTTAGCATAAACTGCGGACACGACATTC       |
|         | CR44131-right HR arm-R | GTGCTGGGTCTCGGAGGAGTGTAGACAGCCGAAAAAAGGG      |
|         | CR44081-left HR arm-F  | AGCGTGGGTCTCGGGCTCCTTCATCGTCTCAACTCTTTC       |
| CR44081 | CR44081-left HR arm-R  | GTGCTGGGTCTCACATCTTCACTCTGCTGTCCAGATATGGT     |
|         | CR44081-right HR arm-F | AGCGTGGGTCTCTTAGCTGCTGGCACCCCTCTTGTGT         |
|         | CR44081-right HR arm-R | GTGCTGGGTCTCGGAGGTCCATCAGTTGTGTGCTTCCG        |
|         | CR43939-left HR arm-F  | AGCGTGGGTCTCGGGCTGAATGTGACGATTCCCAGTCTCA      |
| CR43939 | CR43939-left HR arm-R  | GTGCTGGGTCTCACATCATCAGGTGCAAACTCTATTACAAATATT |
|         | CR43939-right HR arm-F | AGCGTGGGTCTCTTAGCACATCTGCCTGCTTTGTTTTCT       |
|         | CR43939-right HR arm-R | GTGCTGGGTCTCGGAGGAAAGGGGTGACGGATTAAGATGCTT    |
|         | CR43819-left HR arm-F  | CATCATGGTACCGGATAGGTTGGTCGCTTCA               |
| CR43819 | CR43819-left HR arm-R  | ATGGCGGCCGCAAAATAAATTATCAAAGTGTCA             |
|         | CR43819-right HR arm-F | CACATGGCGCGCAATCCACTTATCTGCTTTCATACT          |
|         | CR43819-right HR arm-R | ATGACTAGTCGGGTACTCCCAGGTTCCAT                 |
|         | CR43721-left HR arm-F  | CATCATGGTACCGGCTTCCATTTCTCACACA               |
| CR43721 | CR43721-left HR arm-R  | ATGGCGGCCGCTACTTACATCAGCACTTTG                |
|         | CR43721-right HR arm-F | CACATGGCGCGCCTTAGGGCATTTTTGATAGGTG            |
|         | CR43721-right HR arm-R | ATGACTAGTATCGTTCGTCATTGAGGGTA                 |

---
